# Supplementary material
Source: PubMed Central journal article supplement (PMC10203964)

## Supplementary Online Content

van der Ende NAM, Roozenbeek B, Smagge LEM, et al; for the DUMAS Investigators. Safety and efficacy of dual thrombolytic therapy with mutant prourokinase and small bolus alteplase for ischemic stroke: a randomized clinical trial. *JAMA Neurol*. Published online May 22, 2023. doi:10.1001/jamaneurol.2023.1262

**eTable 1.** Any ICH Subtypes According to the Heidelberg Bleeding Classification in the Modified Intention-to-Treat Population

**eTable 2.** Safety Outcomes With Treatment Effects in the Safety Registry

**eTable 3.** Treatment Effect Estimates on Any Post-Intervention Intracranial Hemorrhage in Pre-Specified Subgroups

**eFigure.** Fibrinogen Levels From Baseline to 24-Hour Post Thrombolytic Treatment in the Modified Intention-to-Treat Population

This supplementary material has been provided by the authors to give readers additional information about their work.

**eTable 1.** Any ICH Subtypes According to the Heidelberg Bleeding Classification in the Modified Intention-to-Treat Population

| Class | Type | Description                                                                                                                        | Intervention (n=121) | Control (n=117) |
|-------|------|------------------------------------------------------------------------------------------------------------------------------------|----------------------|-----------------|
| 1     |      | Hemorrhagic transformation of infarcted brain tissue                                                                               |                      |                 |
| 1a    | HI1  | Scattered small petechiae, no mass effect                                                                                          | 6 (5.0%)             | 6 (5.1%)        |
| 1b    | HI2  | Confluent petechiae, no mass effect                                                                                                | 8 (6.6%)             | 3 (2.6%)        |
| 1c    | PH1  | Hematoma within infarcted tissue, occupying <30%, no substantive mass effect                                                       | 0 (0%)               | 1 (0.9%)        |
| 2     |      | Infarcted hemorrhage within and beyond infarcted brain tissue                                                                      |                      |                 |
|       | PH2  | Hematoma within infarcted brain tissue, occupying >30%, with obvious mass effect                                                   | 2 (1.7)              | 4 (3.4%)        |
| 3     |      | Intracerebral hemorrhage outside the infarcted brain tissue or intracranial-extracerebral hemorrhage                               |                      |                 |
|       |      | Parenchymal hematoma remote from infarcted brain tissue, intraventricular hemorrhage, subarachnoid hemorrhage, subdural hemorrhage | 0 (0%)               | 2 (1.7%)        |

Data are n (%).

HI indicates hemorrhagic infarction; and PH, parenchymal hematoma.

**eTable 2.** Safety Outcomes With Treatment Effects in the Safety Registry

|                                     | <b>Intervention<br/>(n=135)</b> | <b>Control (n=133)</b> |
|-------------------------------------|---------------------------------|------------------------|
| Symptomatic intracranial hemorrhage | 0 (0%)                          | 3 (2.3%)               |
| In-hospital death from all causes   | 0 (0%)                          | 5 (3.8%)               |

**eTable 3.** Treatment Effect Estimates on Any Post-Intervention Intracranial Hemorrhage in Pre-Specified Subgroups

|                                                    | <b>OR (95% CI)</b>  | <b>P-value for interaction</b> |
|----------------------------------------------------|---------------------|--------------------------------|
| <b>Age</b>                                         |                     | 0.84                           |
| <70 years (n=125)                                  | 1.29 (0.35 to 4.75) |                                |
| ≥70 years (n=113)                                  | 0.77 (0.29 to 2.06) |                                |
| <b>Sex</b>                                         |                     | 0.58                           |
| Male (n=147)                                       | 0.79 (0.27 to 2.30) |                                |
| Female (n=91)                                      | 1.19 (0.37 to 3.88) |                                |
| <b>Baseline systolic blood pressure</b>            |                     | 0.62                           |
| <162 mmHg (n=118)                                  | 0.47 (0.13 to 1.68) |                                |
| ≥162 mmHg (n=119)                                  | 1.84 (0.63 to 5.36) |                                |
| <b>Time from symptom onset to IV thrombolytics</b> |                     | 0.78                           |
| <121 min (n=121)                                   | 0.83 (0.28 to 2.40) |                                |
| ≥121 min (n=116)                                   | 1.18 (0.38 to 3.66) |                                |
| <b>Baseline NIHSS</b>                              |                     | 0.49                           |
| <4 (n=127)                                         | 1.02 (0.33 to 3.21) |                                |
| ≥4 (n=111)                                         | 0.98 (0.35 to 2.77) |                                |
| <b>Pre-treatment antiplatelet use</b>              |                     | 0.41                           |
| No (n=145)                                         | 1.16 (0.46 to 2.96) |                                |
| Yes (n=93)                                         | 0.63 (0.13 to 2.98) |                                |

|                                        |                     |      |
|----------------------------------------|---------------------|------|
| <b>DWI lesion on follow-up imaging</b> |                     | 0.99 |
| No (n=100)                             | 5314 (0.00 to inf)  |      |
| Yes (n=138)                            | 0.79 (0.35 to 1.81) |      |
| <b>Lacunar syndrome</b>                |                     | 0.94 |
| No (n=210)                             | 1.00 (0.45 to 2.21) |      |
| Yes (n=28)                             | 0.95 (0.02 to 51.3) |      |

Subgroup analyses were not performed for ASPECTS and extracranial occlusion, because the number of patients with ASPECTS<10 and an extracranial occlusion were very low.

**eFigure.** Fibrinogen Levels From Baseline to 24-Hour Post Thrombolytic Treatment in the Modified Intention-to-Treat Population

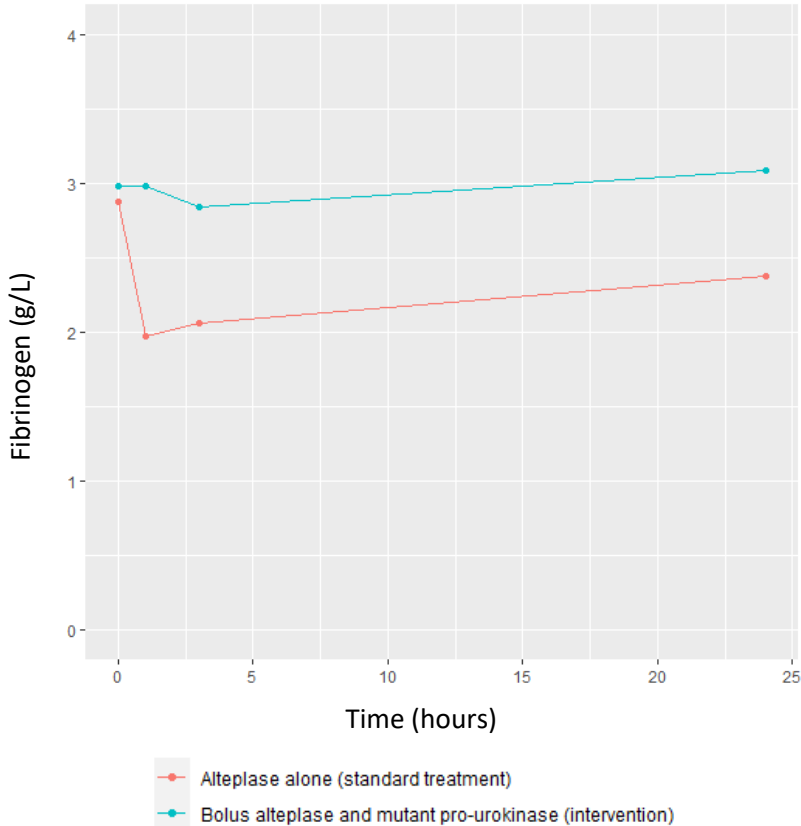

Supplement: jamaneurol-e231262-s002.pdf [file jamaneurol-e231262-s002.pdf]
