# Supplementary material
Source: PubMed Central journal article supplement (PMC10203964)
Supplement: jamaneurol-e231262-s001.pdf [file jamaneurol-e231262-s001.pdf]

1  
2  
3  
4  
5  
6  
7  
8  
9

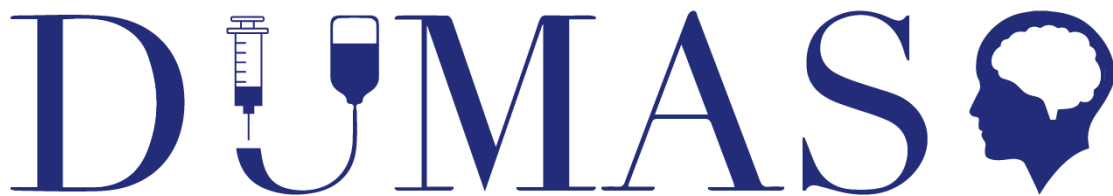

10

11

12 **DUal thrombolytic therapy with Mutant pro-**  
13 **urokinase (m-pro-urokinase, HisproUK) and**  
14 **low dose Alteplase for ischemic Stroke**

15

16 *Research protocol for a multicenter randomized controlled phase II trial.*

17

18

19

20

21

22

23

24 **PROTOCOL TITLE:** 'Dual thrombolytic therapy with mutant pro-urokinase (m-pro-urokinase)  
 25 and low dose alteplase for ischemic stroke.'  
 26

|                                                                           |                                                                                                                                                                                                                                                                                                                                                                                                                       |
|---------------------------------------------------------------------------|-----------------------------------------------------------------------------------------------------------------------------------------------------------------------------------------------------------------------------------------------------------------------------------------------------------------------------------------------------------------------------------------------------------------------|
| <b>Protocol ID</b>                                                        | DUMAS-1.1                                                                                                                                                                                                                                                                                                                                                                                                             |
| <b>Short title</b>                                                        | DUMAS                                                                                                                                                                                                                                                                                                                                                                                                                 |
| <b>Dutch MEC number</b>                                                   | MEC-2019-0001                                                                                                                                                                                                                                                                                                                                                                                                         |
| <b>EudraCT number</b>                                                     | 2018-004448-42                                                                                                                                                                                                                                                                                                                                                                                                        |
| <b>Version</b>                                                            | 1.3.2                                                                                                                                                                                                                                                                                                                                                                                                                 |
| <b>Date</b>                                                               | Dec 20 2018<br><br>(last amendment March 7, 2022)                                                                                                                                                                                                                                                                                                                                                                     |
| <b>Project leaders</b>                                                    | Diederik WJ Dippel, MD, PhD; neurologist; Erasmus MC<br><br>Aad van der Lugt, MD, PhD; neuroradiologist; Erasmus MC                                                                                                                                                                                                                                                                                                   |
| <b>Coordinating investigators</b>                                         | Bob Roozenbeek, MD, PhD; neurologist; Erasmus MC<br><br>Nadinda AM van der Ende, MD; PhD-student; Erasmus MC                                                                                                                                                                                                                                                                                                          |
| <b>Principal investigator(s) (in Dutch: hoofdonderzoeker/ uitvoerder)</b> | <u>Executive committee</u><br><br>Diederik WJ Dippel, MD, PhD; Erasmus MC, Rotterdam<br><br>Aad van der Lugt, MD, PhD; Erasmus MC, Rotterdam<br><br>Bob Roozenbeek, MD, PhD; Erasmus MC, Rotterdam<br><br>Nadinda AM van der Ende, MD; Erasmus MC, Rotterdam<br><br><u>Local principal investigators</u><br><br>Leo Aerden, MD, PhD, Reinier de Graaf, Delft<br><br>Ido R van den Wijngaard, Haaglanden MC, The Hague |

|                                       |                                                                                                             |
|---------------------------------------|-------------------------------------------------------------------------------------------------------------|
|                                       | Heleen den Hertog, Isala, Zwolle                                                                            |
| <b>Sponsor (in Dutch: verrichter)</b> | Erasmus MC University Medical Center<br><br>Dr. Molewaterplein 40<br><br>3015 CD Rotterdam, The Netherlands |
| <b>Subsidising party</b>              | Thrombolytic Science International (TSI)                                                                    |
| <b>Independent expert</b>             | Bart C Jacobs, MD, PhD; neurologist, Erasmus MC, Rotterdam                                                  |
| <b>Laboratory sites</b>               | Department of hematology (laboratory thrombosis and hemostasis)                                             |
| <b>Pharmacy</b>                       | Erasmus MC, Rotterdam                                                                                       |

27

| Version number | Change                                                                                                                                                                                                                                                                                                                                                                                                                                                                                                                                                                                                                                                           | Date       |
|----------------|------------------------------------------------------------------------------------------------------------------------------------------------------------------------------------------------------------------------------------------------------------------------------------------------------------------------------------------------------------------------------------------------------------------------------------------------------------------------------------------------------------------------------------------------------------------------------------------------------------------------------------------------------------------|------------|
| 1.1            | Initial version                                                                                                                                                                                                                                                                                                                                                                                                                                                                                                                                                                                                                                                  | 27-02-2019 |
| 1.2            | <ul style="list-style-type: none"> <li>- Changed independent expert to Bart. C. Jacobs</li> <li>- Addition of inclusion criteria for treatment with intravenous thrombolysis beyond 4.5 hours after symptom onset or last seen well.</li> <li>- Change in sample size: an extra patient will be included for each patient included with a discharge diagnosis other than ischemic stroke</li> <li>- Change of secondary clinical outcome: modified Rankin Scale (mRS) at 90 days is changed to mRS at 30 days</li> <li>- Change of safety outcome: death from any cause including intracranial hemorrhage within 90 days is changed to within 30 days</li> </ul> | 26-03-2020 |

|       |                                                                                                                                                                                                                                                                                                                                                                                                                                                                                                          |            |
|-------|----------------------------------------------------------------------------------------------------------------------------------------------------------------------------------------------------------------------------------------------------------------------------------------------------------------------------------------------------------------------------------------------------------------------------------------------------------------------------------------------------------|------------|
|       | <ul style="list-style-type: none"> <li>- Update in study procedures: Sequences with gadolinium are added to the MRI at 24-48 hours</li> <li>- Addition of NCCT and CT-perfusion as follow-up option in the event of contra-indications for MRI after randomization</li> <li>- Update of the DSMB members and interim analysis</li> <li>- Update in the labeling of IMP</li> <li>- Update in study organization and study committees</li> <li>- An appendix with imaging requirements is added</li> </ul> |            |
| 1.3   | <ul style="list-style-type: none"> <li>- Specification of the safety outcome, SAE, and SUSAR period (page 23, 27-28)</li> <li>- Update in replacement of individual subjects (page 25)</li> <li>- Update of follow-up of subjects who do not give or have withdrawn consent (page 25)</li> <li>- Update in statistical analysis (page 29)</li> <li>- Removal of the adverse event committee (page 49)</li> </ul>                                                                                         | 22-12-2021 |
| 1.3.2 | <ul style="list-style-type: none"> <li>- Non-substantial textual changes to protocol</li> </ul>                                                                                                                                                                                                                                                                                                                                                                                                          | 07-03-2022 |



|    |                                                                         |    |
|----|-------------------------------------------------------------------------|----|
| 32 | <b>TABLE OF CONTENTS</b>                                                |    |
| 33 |                                                                         |    |
| 34 | PROTOCOL TITLE 2                                                        |    |
| 35 | TABLE OF CONTENTS                                                       | 6  |
| 36 | LIST OF ABBREVIATIONS AND RELEVANT DEFINITIONS                          | 10 |
| 37 | SUMMARY                                                                 | 12 |
| 38 | 1. INTRODUCTION AND RATIONALE                                           | 14 |
| 39 | 2. OBJECTIVES                                                           | 16 |
| 40 | 3. STUDY DESIGN                                                         | 16 |
| 41 | 4. STUDY POPULATION                                                     | 16 |
| 42 | 4.1 Population (base)                                                   | 16 |
| 43 | 4.2 Inclusion criteria                                                  | 16 |
| 44 | 4.3 Exclusion criteria                                                  | 17 |
| 45 | 4.4 Sample size calculation                                             | 18 |
| 46 | 5. TREATMENT OF SUBJECTS                                                | 18 |
| 47 | 5.1 Investigational product                                             | 18 |
| 48 | 5.2 Use of co-intervention                                              | 18 |
| 49 | 5.3 Monitoring of subject compliance                                    | 19 |
| 50 | 6. INVESTIGATIONAL PRODUCT                                              | 19 |
| 51 | 6.1 Name and description of investigational product(s)                  | 19 |
| 52 | 6.2 Summary of findings from non-clinical studies                       | 19 |
| 53 | 6.3 Summary of findings from clinical studies                           | 20 |
| 54 | 6.4 Summary of known and potential risks and benefits                   | 20 |
| 55 | 6.5 Description and justification of route of administration and dosage | 21 |
| 56 | 6.6 Dosages, dosage modifications and method of administration          | 21 |
| 57 | 6.7 Preparation and labeling of Investigational Medicinal Product       | 21 |
| 58 | 6.8 Drug accountability                                                 | 22 |
| 59 | 7. NON-INVESTIGATIONAL PRODUCT                                          | 22 |
| 60 | 8. METHODS                                                              | 22 |

|    |       |                                                                                |    |
|----|-------|--------------------------------------------------------------------------------|----|
| 61 | 8.1   | Study parameters/endpoints                                                     | 22 |
| 62 | 8.1.1 | Main study parameter/endpoint                                                  | 22 |
| 63 | 8.1.2 | Secondary study parameters/endpoints                                           | 22 |
| 64 | 8.1.3 | Other study parameters                                                         | 23 |
| 65 | 8.2   | Randomization, blinding and treatment allocation                               | 24 |
| 66 | 8.3   | Study procedures                                                               | 24 |
| 67 | 8.4   | Withdrawal of individual subjects                                              | 24 |
| 68 | 8.5   | Replacement of individual subjects after withdrawal                            | 25 |
| 69 |       | An additional patient will be included (i.e, replaced) for each patient who    | 25 |
| 70 |       | -did not give consent for participation in the study, or                       | 25 |
| 71 |       | -for any reason did not receive the full dose of thrombolytics as assigned, or | 25 |
| 72 |       | -had a discharge diagnosis other than ischemic stroke (e.g. stroke mimic),     | 25 |
| 73 | 8.6   | Follow-up of subjects withdrawn from treatment                                 | 25 |
| 74 | 8.7   | Premature termination of the study                                             | 25 |
| 75 | 9.    | SAFETY REPORTING                                                               | 26 |
| 76 | 9.1   | Temporary halt for reasons of subject safety                                   | 26 |
| 77 | 9.2   | AEs, SAEs and SUSARs                                                           | 26 |
| 78 | 9.2.1 | Adverse events (AEs)                                                           | 26 |
| 79 | 9.2.2 | Serious adverse events (SAEs)                                                  | 26 |
| 80 | 9.2.3 | Suspected unexpected serious adverse reactions (SUSARs)                        | 27 |
| 81 | 9.3   | Annual safety report                                                           | 28 |
| 82 | 9.4   | Follow-up of adverse events                                                    | 28 |
| 83 | 9.5   | Data Safety Monitoring Board (DSMB)                                            | 28 |
| 84 | 10.   | STATISTICAL ANALYSIS                                                           | 29 |
| 85 | 10.1  | Primary study parameter(s)                                                     | 30 |
| 86 | 10.2  | Secondary study parameter(s)                                                   | 30 |
| 87 | 10.3  | Interim analysis                                                               | 30 |
| 88 | 11.   | ETHICAL CONSIDERATIONS                                                         | 31 |
| 89 | 11.1  | Regulation statement                                                           | 31 |

|     |      |                                                                                                                                                                           |    |
|-----|------|---------------------------------------------------------------------------------------------------------------------------------------------------------------------------|----|
| 90  | 11.2 | Recruitment and consent                                                                                                                                                   | 31 |
| 91  | 11.3 | Objection by minors or incapacitated subjects                                                                                                                             | 32 |
| 92  | 11.4 | Benefits and risks assessment, group relatedness                                                                                                                          | 32 |
| 93  | 11.5 | Compensation for injury                                                                                                                                                   | 32 |
| 94  | 12.  | ADMINISTRATIVE ASPECTS, MONITORING AND PUBLICATION                                                                                                                        | 33 |
| 95  | 12.1 | Handling and storage of data and documents                                                                                                                                | 33 |
| 96  | 12.2 | Monitoring and Quality Assurance                                                                                                                                          | 33 |
| 97  | 12.3 | Amendments                                                                                                                                                                | 34 |
| 98  | 12.4 | Annual progress report                                                                                                                                                    | 34 |
| 99  | 12.5 | Temporary halt and (prematurely) end of study report                                                                                                                      | 34 |
| 100 | 12.6 | Public disclosure and publication policy                                                                                                                                  | 34 |
| 101 | 13.  | STRUCTURED RISK ANALYSIS                                                                                                                                                  | 35 |
| 102 | 13.1 | Potential issues of concern                                                                                                                                               | 35 |
| 103 | 13.2 | Synthesis                                                                                                                                                                 | 37 |
| 104 | 14.  | REFERENCES                                                                                                                                                                | 38 |
| 105 | 15.  | TABLES                                                                                                                                                                    | 42 |
| 106 | 15.1 | Table 1: Classification of intracranial hemorrhage according to location, severity and causal relation with neurological deterioration                                    | 42 |
| 107 |      |                                                                                                                                                                           |    |
| 108 | 15.2 | Table 2: Schedule of all study activities                                                                                                                                 | 44 |
| 109 | 16.  | FIGURES                                                                                                                                                                   | 45 |
| 110 | 16.1 | Figure 1. Patient flow in the trial                                                                                                                                       | 45 |
| 111 | 16.2 | Figure 2: selection of patients into simple modified intention-to-treat, targeted modified intention-to-treat, and modified on-treatment, as well as per protocol groups. | 46 |
| 112 |      |                                                                                                                                                                           |    |
| 113 | 17.  | APPENDICES                                                                                                                                                                | 47 |
| 114 | 17.1 | Appendix 1: Distribution of study medication (m-pro-urokinase)                                                                                                            | 47 |
| 115 | 17.2 | Appendix 2: Study personnel                                                                                                                                               | 48 |
| 116 | 17.3 | Appendix 3: Study organization and study committees                                                                                                                       | 49 |
| 117 | 17.4 | Appendix 4: Core data set                                                                                                                                                 | 51 |
| 118 | 17.5 | Appendix 5: Imaging requirements                                                                                                                                          | 55 |
| 119 | 17.6 | Appendix 6: Adaptive design – Design and Simulation Report                                                                                                                | 57 |



---

|     |        |                           |    |
|-----|--------|---------------------------|----|
| 120 | 17.6.1 | Introduction              | 57 |
| 121 | 17.6.2 | Statistical Modeling      | 57 |
| 122 | 17.6.3 | Study Design              | 59 |
| 123 | 17.6.4 | Simulation Scenarios      | 59 |
| 124 | 17.6.5 | Operating Characteristics | 61 |
| 125 | 17.6.6 | Computational Details     | 62 |
| 126 |        |                           |    |
| 127 |        |                           |    |

128 **LIST OF ABBREVIATIONS AND RELEVANT DEFINITIONS**

129

|                 |                                                                                                                                                                                                                        |
|-----------------|------------------------------------------------------------------------------------------------------------------------------------------------------------------------------------------------------------------------|
| ABR             | General Assessment and Registration form (ABR form), the application form that is required for submission to the accredited Ethics Committee; in Dutch: Algemeen Beoordelings- en Registratieformulier (ABR-formulier) |
| AE              | Adverse Event                                                                                                                                                                                                          |
| AR              | Adverse Reaction                                                                                                                                                                                                       |
| CA              | Competent Authority                                                                                                                                                                                                    |
| CCMO            | Central Committee on Research Involving Human Subjects; in Dutch: Centrale Commissie Mensgebonden Onderzoek                                                                                                            |
| CI              | Confidence interval                                                                                                                                                                                                    |
| CT              | Computed tomography                                                                                                                                                                                                    |
| CTA             | Computed tomography angiography                                                                                                                                                                                        |
| CTP             | Computed tomography perfusion                                                                                                                                                                                          |
| CV              | Curriculum Vitae                                                                                                                                                                                                       |
| DSMB            | Data Safety Monitoring Board                                                                                                                                                                                           |
| EU              | European Union                                                                                                                                                                                                         |
| EudraCT         | European drug regulatory affairs Clinical Trials                                                                                                                                                                       |
| GCP             | Good Clinical Practice                                                                                                                                                                                                 |
| GDPR            | General Data Protection Regulation; in Dutch: Algemene Verordening Gegevensbescherming (AVG)                                                                                                                           |
| HisproUK        | Mutant pro-urokinase                                                                                                                                                                                                   |
| m-pro-urokinase | Mutant pro-urokinase                                                                                                                                                                                                   |
| IB              | Investigator's Brochure                                                                                                                                                                                                |
| IC              | Informed Consent                                                                                                                                                                                                       |
| ICH             | Intracranial hemorrhage                                                                                                                                                                                                |
| IV              | Intravenous                                                                                                                                                                                                            |
| IMP             | Investigational Medicinal Product                                                                                                                                                                                      |
| IMPD            | Investigational Medicinal Product Dossier                                                                                                                                                                              |
| METC            | Medical research ethics committee (MREC); in Dutch: medisch-ethische toetsingscommissie (METC)                                                                                                                         |
| MI              | Myocardial infarction                                                                                                                                                                                                  |
| MRI             | Magnetic resonance imaging                                                                                                                                                                                             |
| mRS             | Modified Rankin Scale                                                                                                                                                                                                  |
| NIHSS           | National Institute of Health Stroke Scale                                                                                                                                                                              |

|                   |                                                                                                                                                                                                                                                  |
|-------------------|--------------------------------------------------------------------------------------------------------------------------------------------------------------------------------------------------------------------------------------------------|
| NCCT              | Non contrast computed tomography                                                                                                                                                                                                                 |
| OR                | Odds ratio                                                                                                                                                                                                                                       |
| PROBE             | Prospective randomized open blinded end-point                                                                                                                                                                                                    |
| (S)AE             | (Serious) Adverse Event                                                                                                                                                                                                                          |
| SPC               | Summary of Product Characteristics; in Dutch: officiële productinformatie IB1-tekst                                                                                                                                                              |
| Sponsor           | The sponsor is the party that commissions the organisation or performance of the research, for example a pharmaceutical company, academic hospital, scientific organisation or investigator; in this case: Erasmus MC University Medical Center. |
| Subsidising Party | A party that provides funding for a study but does not commission it is not regarded as the sponsor, but referred to as a subsidising party. In this case: TSI                                                                                   |
| SUSAR             | Suspected Unexpected Serious Adverse Reaction                                                                                                                                                                                                    |
| UAVG              | Dutch Act on Implementation of the General Data Protection Regulation; in Dutch: Uitvoeringswet AVG                                                                                                                                              |
| WMO               | Medical Research Involving Human Subjects Act; in Dutch: Wet Medisch-wetenschappelijk Onderzoek met Mensen                                                                                                                                       |

130

131

132 **SUMMARY**

133

134 **Rationale:** Recombinant tissue plasminogen activator alteplase is the only FDA-approved  
135 thrombolytic agent for thrombolytic treatment of ischemic stroke patients. Its effectiveness is  
136 limited and the occurrence of intra- and extracerebral hemorrhage is a major limitation. Dual  
137 thrombolytic therapy with low dose alteplase pre-treatment followed by a mutant pro-  
138 urokinase (m-pro-urokinase, HisproUK), which does not lyse hemostatic fibrin, has a  
139 significant potential to be safer and more efficacious than the FDA-approved regimen of  
140 standard dose alteplase alone.

141 **Objective:** To test the safety and preliminary efficacy of a dual acute thrombolytic treatment  
142 consisting of a small intravenous (IV) bolus of alteplase followed by IV infusion of m-pro-  
143 urokinase against usual treatment with IV alteplase in patients presenting with ischemic  
144 stroke.

145 **Study design:** This is a multicenter, phase II, randomized clinical trial with open-label  
146 treatment, adaptive design for dose optimization and blinded outcome assessment,  
147 comparing low dose IV alteplase + two different dosages of IV m-pro-urokinase with usual  
148 thrombolytic treatment of alteplase alone.

149 **Study population:** We will enroll patients with a discharge diagnosis of ischemic stroke,  
150 intracranial hemorrhage ruled out with non-contrast CT, who meet the criteria for standard  
151 treatment for IV alteplase, and who are not considered eligible for endovascular  
152 thrombectomy.

153 **Intervention and usual care:** Bolus of IV alteplase (5 mg) followed by continuous IV infusion  
154 of the study medication: m-pro-urokinase 40 mg/hr during 60 minutes (initial dose) or  
155 standard treatment with alteplase alone. Depending on results of interim analyses, the  
156 alternate dose of m-pro-urokinase may be revised to a lower dose (30 mg/hr during 60  
157 minutes) or a higher dose (50mg/hr during 60 minutes). Usual care consists of a bolus of IV  
158 alteplase followed by continuous infusion of alteplase in a total dose of 0.9 mg/kg with a  
159 maximum of 90 mg.

160 **Primary and secondary outcomes:** The primary outcome is any post-intervention  
161 intracranial hemorrhage on neuroimaging according to the Heidelberg Bleeding Classification  
162 within 24-48 hours (range: 12-48 hours) of study drug administration. Secondary outcomes  
163 include stroke severity measured with the National Institutes of Health Stroke Scale (NIHSS)  
164 at 24 hours and 5-7 days, score on the modified Rankin Scale (mRS) assessed at 30 days,  
165 dichotomized mRS, infarct volume measured with MRI at 24-48 hours, change (pre-  
166 treatment vs. post-treatment) in abnormal perfusion volume and secondary blood biomarkers  
167 of thrombolysis at 24 hours (including d-dimers and fibrinogen level). Safety endpoints  
168 include symptomatic intracranial hemorrhage, death and major extracranial hemorrhage.

169 **Nature and extent of the burden and risks associated with participation, benefit and**  
170 **group relatedness:**

171 M-pro-urokinase has an improved safety profile and similar effectiveness as alteplase in ex-  
172 and in-vivo experimental studies as well as in a clinical study in myocardial infarction. The  
173 informed consent procedure takes on average one hour, both in proxies and in stroke  
174 patients themselves. For every 15 minutes of delay of IV thrombolytic treatment, the  
175 likelihood of a good functional outcome is reduced by 1% (absolute risk difference). We will  
176 therefore defer consent and ask for written informed consent as early as deemed appropriate  
177 according to the treating physician.

178 **Trial registration:** <http://www.trialregister.nl>, Unique identifier: NL7409 (NTR7634); and  
179 <https://www.clinicaltrials.gov>. Unique identifier: NCT04256473.

180

## 181 1. INTRODUCTION AND RATIONALE

182

183 Currently, recombinant tissue plasminogen activator alteplase is the only FDA-approved  
184 thrombolytic agent for thrombolytic treatment of ischemic stroke. Its effectiveness is limited  
185 and it carries a risk of symptomatic intracerebral hemorrhage (ICH) of 6-7%.<sup>1-3</sup> The drug is  
186 given intravenously in a dose of 0.9 mg/kg, with 10% bolus followed by a continuous infusion  
187 over 60 minutes of the remaining 90%. Its use is limited to patients presenting within 4.5  
188 hours after symptom onset and patients with unknown time of onset with a mismatch  
189 between diffusion-weighted imaging and fluid-attenuated inversion recovery (FLAIR).<sup>4</sup>

190 Recently, it has been shown that alteplase is also beneficial for patients presenting between  
191 4.5 hours to 12 hours from symptom onset or last seen well if they have still viable ischemic  
192 brain tissue which can be identified with advanced imaging.<sup>5</sup>

193 Additional treatment with endovascular thrombectomy is effective in patients with an  
194 occlusion, located in the intracranial carotid, or the horizontal segment of the middle cerebral  
195 artery (M1 and proximal M2). This type of occlusion is present in at most 30% of ischemic  
196 stroke patients presenting at the emergency department.<sup>6</sup>

197 Patients without a treatable intracranial occlusion can only be treated with a thrombolytic  
198 agent. This thrombolytic treatment with alteplase in patients with ischemic stroke leads on  
199 average to improved reperfusion in about 30% of patients and increases the likelihood of  
200 good clinical outcome in 1 of every 10 treated patients.<sup>1</sup> Apart from its limited efficacy, the  
201 occurrence of intra- and extracranial hemorrhage is a major limitation in the treatment with  
202 alteplase. In the Cochrane analysis, thrombolytic treatments consistently increased the risk  
203 of symptomatic intracranial hemorrhage fourfold, from 1.7% to 7.5% (OR 3.75, 95%CI 3.11 to  
204 4.51,  $P < 0.00001$ ), with no statistically significant heterogeneity ( $p=0.36$ ).<sup>1</sup>

205 Several classifications of intracranial hemorrhage are in use, i.e. NINDS classification,  
206 ECASS II classification, and the recent Heidelberg Bleeding Classification. An overview of  
207 these classifications is provided in Table 1 (Section 15.1). An intracranial hemorrhage can  
208 either be classified symptomatic or asymptomatic. In most studies, symptomatic intracranial  
209 hemorrhage is defined as an increase in neurological deficit of 4 points or more on the NIH  
210 stroke scale, or death, with hemorrhage confirmed by neuroimaging, with a distinction being  
211 made between hemorrhagic infarction, intracerebral hemorrhage, subarachnoid and  
212 intraventricular hemorrhage.<sup>7,8</sup> This implies that several hemorrhages may cause more  
213 subtle deterioration and still be classified as asymptomatic. In many instances, intracranial  
214 hemorrhage or hemorrhagic infarction does not lead to overt clinical deterioration and the  
215 hemorrhage is classified as asymptomatic. The incidence of asymptomatic intracranial  
216 hemorrhage or any intracranial hemorrhage is often not reported. The classification of  
217 hemorrhage on CT leaves considerable room for interpretation and interobserver variability.

218 In the NOR-TEST trial of IV tenecteplase versus IV alteplase in 1100 patients with ischemic  
219 stroke, the incidence of symptomatic intracranial hemorrhage was only 2% and the incidence  
220 of any ICH was 9% in the alteplase group.<sup>9</sup> In the SITS-MOST, a multicenter registry of 6483  
221 patients who were treated with IV alteplase, the incidence of symptomatic hemorrhage was  
222 4.6%, and the incidence of asymptomatic hemorrhage was 17%. In the MR CLEAN trial, the  
223 likelihood of any intracerebral hemorrhage (ICH) or hemorrhagic transformation according to  
224 the ECASS II classification in patients who had been treated with IV alteplase was 46%. 7%  
225 had a symptomatic ICH. Thrombectomy did not influence this rate.<sup>10</sup>

226 It has been suggested that Asian patients are at increased risk of symptomatic intracranial  
227 hemorrhage after treatment with alteplase.<sup>11</sup> However, studies show inconsistent results and  
228 have not led to altered recommendations in Dutch or US guidelines regarding dose changes  
229 for Asian patients.<sup>12-16</sup>

230 There is a need for a better and safer thrombolytic therapy, that expands the number of  
231 patients that will be treated safely and successfully. Tenecteplase at a dose of 0.25 mg/kg is  
232 a promising alternative to alteplase, because of its ease of administration, but until now,  
233 superiority or even non-inferiority has not been sufficiently demonstrated. Also, the rate of  
234 hemorrhage in patients treated with tenecteplase and alteplase are similar.<sup>9, 17-20</sup>

235 Preclinical and clinical studies have indicated that dual thrombolytic therapy, mimicking the  
236 physiological design of thrombolysis, with low dose alteplase pre-treatment followed by a  
237 mutant pro-urokinase (m-pro-urokinase, brand-name: HisproUK) has a significant potential to  
238 be safer and more efficacious than the FDA-approved regimen of standard dose alteplase  
239 alone (0.9 mg/kg).<sup>21-23</sup> M-pro-urokinase is a mutation of pro-urokinase with less susceptibility  
240 to non-specific activation to urokinase. Moreover, m-pro-urokinase by itself does not lyse  
241 hemostatic fibrin, only degraded fibrin.<sup>24</sup> When alteplase is cleared from the systemic  
242 circulation, m-pro-urokinase will only induce intravascular clot lysis while sparing hemostatic  
243 fibrin. Therefore, this therapeutic regimen has the potential to be safer. However, everywhere  
244 where alteplase is bound to plasminogen, activation of m-pro-urokinase may occur. These  
245 considerations argue for using all intracranial hemorrhages as the primary outcome. They  
246 lead to the necessity of having a core lab for consistent and blinded assessment of all follow  
247 up scans for hemorrhage classification.

## 248 2. OBJECTIVES

249

250 To test the safety and preliminary efficacy of a dual acute thrombolytic treatment consisting  
251 of a small bolus of intravenous (IV) alteplase followed by IV infusion of mutant pro-urokinase  
252 (m-pro-urokinase) against usual treatment with IV alteplase in patients presenting acutely  
253 with ischemic stroke.

254

## 255 3. STUDY DESIGN

256

257 This is a multicenter, phase II, randomized clinical trial with open-label treatment and blinded  
258 outcome assessment (PROBE) study comparing low dose IV alteplase + two different  
259 dosages of IV m-pro-urokinase with usual thrombolytic treatment. Sequential interim  
260 analyses will be performed allowing adaptation of the IV m-pro-urokinase dose, because the  
261 exact optimal dose of IV m-pro-urokinase in patients with ischemic stroke is still unknown.  
262 This study will run in several hospitals in the Netherlands. An overview of the study and the  
263 main procedures that subjects will undergo is provided in Figure 1 (Section 0).

264

## 265 4. STUDY POPULATION

### 266 4.1 Population (base)

267 The study population will be drawn from patients with a clinical diagnosis of ischemic stroke  
268 at the Emergency Department. Patients meeting the inclusion and exclusion criteria as set  
269 below will be entered in the trial.

### 270 4.2 Inclusion criteria

271 In order to be eligible to participate in this study, a subject must meet all of the following  
272 criteria:

- 273 - A clinical diagnosis of ischemic stroke;
- 274 - A score of at least 1 on the NIH Stroke Scale;
- 275 - CT or MRI ruling out intracranial hemorrhage;
- 276 - Treatment is possible
  - 277 ○ within 4.5 hours from symptom onset or last seen well, or
  - 278 ○ between 4.5 to 12 hours from symptom onset or last seen well and
    - 279 ▪ the infarct core is less than 25 mL **and** a penumbra is at least the
    - 280 same size as the infarct core (i.e. total ischemic volume/infarct core
    - 281 mismatch  $\geq 2.0$ ),<sup>5</sup>
    - 282 ▪ or in case of lacunar syndrome,<sup>25</sup> if there is a diffusion-weighted
    - 283 imaging and FLAIR mismatch<sup>4</sup>;



- 284 - The criteria for standard treatment with IV alteplase according to national guidelines  
285 are met<sup>26</sup>;
- 286 - Patient age is 18 years or older;
- 287 - Patient or legal representative has provided written informed consent (deferred).

### 288 **4.3 Exclusion criteria**

289 A potential subject who meets any of the following criteria will be excluded from participation  
290 in this study:

- 291 - The subject is eligible for endovascular thrombectomy (i.e., has a proximal  
292 intracranial large artery occlusion on CTA or MRA);
- 293 - Contra-indication for treatment with IV alteplase according to national guidelines<sup>26</sup>:
- 294 ○ Arterial blood pressure exceeding 185/110 mmHg and not responding to  
295 treatment
  - 296 ○ Blood glucose less than 2.7 or over 22.2 mmol/L
  - 297 ○ Cerebral infarction in the previous 6 weeks with residual neurological deficit or  
298 signs of recent infarction on neuro-imaging
  - 299 ○ Head trauma in the previous 4 weeks
  - 300 ○ Major surgery or serious trauma in the previous 2 weeks
  - 301 ○ Gastrointestinal or urinary tract hemorrhage in the previous 2 weeks
  - 302 ○ Previous intracerebral hemorrhage
  - 303 ○ Use of anticoagulant with INR exceeding 1.7 or APTT exceeding 50 seconds
  - 304 ○ Known thrombocyte count less than  $90 \times 10^9/L$ . When the treating physician  
305 suspects a thrombocyte count below  $90 \times 10^9/L$  (e.g. suspected hemorrhagic  
306 diathesis), the thrombocyte count in the laboratory should be awaited prior to  
307 inclusion in DUMAS.
  - 308 ○ Treatment with direct thrombin or factor X inhibitors, unless specific antidotum  
309 has been given, i.e. idarucizumab in case of dabigatran use.
- 310 - Pre-stroke disability which interferes with the assessment of functional outcome at 30  
311 days, i.e. mRS > 2;
- 312 - Known pregnancy or if pregnancy cannot be excluded, i.e., adequate use of any  
313 contraceptive method (e.g. intrauterine devices) or sterilization of the subject herself.
- 314 - Contra-indication for an MRI scan, i.e.:
- 315 ○ an MRI incompatible pacemaker, ICD, pacing wires and loop records
  - 316 ○ metallic foreign bodies (e.g. intra-ocular)
  - 317 ○ prosthetic heart valves
  - 318 ○ blood vessel clips, coils or stents not confirmed to be MRI compatible

- 319 ○ an implanted electronic and/or magnetic implant or pump (e.g.
- 320 neurostimulator)
- 321 ○ cochlear implants
- 322 ○ mechanical implants (implanted less than 6 weeks ago)
- 323 ○ a copper intrauterine device
- 324 - Participation in any medical or surgical therapeutic trial other than DUMAS (or MR
- 325 ASAP<sup>27</sup>/ARTEMIS<sup>28</sup>)

#### 326 **4.4 Sample size calculation**

327 We will include 200 patients with a discharge diagnosis of ischemic stroke randomized 1:1 to  
328 either standard thrombolytic treatment or dual thrombolytic treatment. We assume that the  
329 primary outcome, any ICH, will occur with a probability of 20%<sup>29</sup> with standard thrombolytic  
330 treatment and a probability of 7% in the patients treated with dual thrombolytic therapy, for an  
331 overall effect (OR) of 0.3. This sample size will provide us with a power of at least 77% to  
332 detect a statistically significant effect on the primary outcome. This estimate does not take  
333 into account the use of multivariable adjustment for difference in baseline characteristics in  
334 the primary analysis, which will increase the power by 10-25%. To compensate for inclusion  
335 of patients with a discharge diagnosis other than ischemic stroke (e.g. stroke mimic) 5  
336 patients who did not receive the full dose of thrombolytics as assigned, we will include  
337 additional patients on a 1 to 1 basis. This implies that we expect that the intention to treat  
338 population will be larger. We estimate that 20% of the included patients will not have a  
339 diagnosis of ischemic stroke at discharge.

340

### 341 **5. TREATMENT OF SUBJECTS**

#### 342 **5.1 Investigational product**

343 The investigational treatment is dual thrombolytic therapy with low dose alteplase pre-  
344 treatment followed by m-pro-urokinase. In this study patients will receive a bolus of IV  
345 alteplase (5 mg), as part of usual care, followed by a continuous infusion of m-pro-urokinase.  
346 The study has an open label design. The study medication (m-pro-urokinase) will be  
347 compared with usual care (alteplase alone), no placebo will be used.

#### 348 **5.2 Use of co-intervention**

349 No standard co-medication is advised by the Steering Committee. However, as described  
350 earlier, patients in the intervention group should receive a bolus of 5mg alteplase prior to  
351 infusion with m-pro-urokinase. No rescue medication is available. If a patient is randomized  
352 for treatment with m-pro-urokinase, it is not possible to also treat a patient with standard  
353 dose alteplase, due to the risk of hemorrhage. If an anaphylactoid reaction occurs with either

354 alteplase or mutant pro-urokinase, treatment will be stopped immediately and appropriate  
355 anaphylactoid treatment will be given according to local guidelines.

### 356 **5.3 Monitoring of subject compliance**

357 We will monitor if patients received full dosages of the thrombolytic treatment or not at the  
358 emergency and neurology department. When thrombolytic treatment is stopped early, the  
359 causes and total dosage thrombolytic therapy received will be collected.

360

## 361 **6. INVESTIGATIONAL PRODUCT**

### 362 **6.1 Name and description of investigational product(s)**

363 The investigational treatment is m-pro-urokinase. Patients in the intervention group will be  
364 treated with a bolus of IV alteplase (5 mg) followed by a continuous infusion of m-pro-  
365 urokinase. Pre-treatment with alteplase is needed, because m-pro-urokinase only binds  
366 degraded fibrin. This therapeutic scheme has the potential to be safer, because alteplase will  
367 have almost completely disappeared from the systemic circulation within 20 minutes, as  
368 alteplase has a plasma half-life of 4-5 minutes),<sup>30</sup> and in the absence of alteplase, m-pro-  
369 urokinase will not be activated. On the other hand, alteplase binds to PAI-1, by which it is de-  
370 activated, and to the plasminogen – fibrin complex, where it will promote release of plasmin,  
371 which in its turn breaks down fibrin, but also fibrinogen.<sup>31</sup> The half-life of the alteplase-  
372 plasminogen complex is not well known, but it is considerably longer than the half-life of  
373 alteplase in the systemic circulation.<sup>32</sup> Therefore, the beneficial effect of m-pro-urokinase  
374 over alteplase is by no means certain.

375 HisprouUK is a single chain polypeptide of 411 amino acids. It has the sequence of  
376 human pro-urokinase with a single point mutation Lys300→His and a molecular weight of  
377 46376.7 Da. M-pro-urokinase is predominantly cleared by the liver and has a half-life of 11-  
378 12 minutes. It is packed in vials of 20 mg and must be stored at -70°C to -80°C. It is possible  
379 to store at 5°C, however, than it has an expiry date of 6 months. Detailed information can be  
380 found in the investigator's brochure (IB).

### 381 **6.2 Summary of findings from non-clinical studies**

382 M-pro-urokinase is a Lys300 > His mutation of pro-urokinase with less susceptibility to non-  
383 specific (systemic) activation to urokinase, due to lessened intrinsic proteolytic activity.<sup>23</sup> A  
384 study in dogs showed a better clot-specific lysis, with less systemic bleeding.<sup>21</sup> Another  
385 experimental study with m-pro-urokinase in dogs, suggest a higher fibrinolytic effect and  
386 confirm that m-pro-urokinase by itself, in the absence of alteplase in the systemic circulation  
387 does not lyse hemostatic fibrin and will not deplete levels of circulation fibrinogen.<sup>22</sup> Intact  
388 fibrin contains only the D-domain plasminogen, which is the favored substrate of alteplase.

389 Partially degraded fibrin bears three C-terminal lysines on the fibrin fragment E domain  
390 providing a high affinity-binding site for plasminogen, which induces a conformational  
391 change. This is the favored substrate of m-pro-urokinase (and pro-urokinase).<sup>24</sup> Detailed  
392 information can be found in the investigational medicinal product dossier (IMPD) and  
393 investigator's brochure (IB).

### 394 **6.3 Summary of findings from clinical studies**

395 M-pro-urokinase has only been studied in healthy male volunteers. This phase 1 study of IV  
396 administration of m-pro-urokinase at therapeutic dosages showed that m-pro-urokinase was  
397 safe and does not result in bleeding or fibrinogen depletion in healthy volunteers (see  
398 separate appendix: 'Phase 1 trial of mutant proUK (HisproUK), version 3.0, d.d. 28-03-2018).

399 Pro-urokinase, however, is well studied. The structural and physical characteristics of m-  
400 pro-urokinase are similar to pro-urokinase, therefore the specific activation on the fibrin clot is  
401 equal. Two randomized trials of intra-arterial treatment in patients with acute ischemic stroke  
402 with pro-urokinase have been carried out.<sup>33, 34</sup> More patients in the intervention arm of the  
403 trial reperfused and more patients had a favorable outcome than controls, despite an  
404 increased rate of intracerebral hemorrhage.

405 A single arm study of sequential treatment with a 5-10 mg alteplase bolus followed by a  
406 90 minutes continuous infusion of pro-urokinase at a rate of 40 mg/hr in 101 patients with ST  
407 elevation myocardial infarction, reported a 77% TIMI 2-3 reperfusion rate, with 60% of  
408 patients reaching TIMI 3,<sup>35</sup> which compares favorably to the effect of other fibrinolytics  
409 (alteplase, tenecteplase) in acute MI.<sup>36, 37</sup>

410

### 411 **6.4 Summary of known and potential risks and benefits**

412 The potential benefits of the intervention have been described in Section 1. The potential  
413 risks of thrombolytic therapy consist of hemorrhage, in particular symptomatic intracranial  
414 hemorrhage. In the SITS-MOST, an international registry of patients treated with IV  
415 alteplase, the incidence of symptomatic hemorrhage was 4.6%, and the incidence of any  
416 hemorrhage was 17%.<sup>29</sup> In a similar Canadian registry (CASES), the incidence of any  
417 hemorrhage was 27%.<sup>38</sup>

418 Severe extracranial hemorrhage occurs in about 1% of patients who receive alteplase.<sup>30</sup>  
419 Dual thrombolytic therapy with low dose alteplase followed by m-pro-urokinase have a  
420 potential to be safer, because of the result of preclinical and clinical studies (described in  
421 Section 6.2 and Section 6.3). Adverse events of m-pro-urokinase are displayed in Table 6 of  
422 the phase 1 study of m-pro-urokinase (see appendix).

## 423 **6.5 Description and justification of route of administration and dosage**

424 Alteplase and m-pro-urokinase will be administered intravenously, since it is the only  
425 currently available effective route. The half-life of m-pro-urokinase is around 11 minutes and  
426 will therefore be administered with a continuous infusion.

427 Trials of fibrinolytic treatment that used similar doses of the drug as were used in trials of  
428 fibrinolytic treatment of acute myocardial infarction reported high rates of intracranial  
429 hemorrhage, and no beneficial effect of treatment on functional outcome.<sup>39, 40</sup> That prompted  
430 investigators of thrombolytic therapy for ischemic stroke to use doses of 60% to 90% of the  
431 dose used in MI. For example, in GUSTO, a randomized controlled trial in patients with acute  
432 myocardial infarction, the most effective thrombolytic regimen was accelerated tPA in a bolus  
433 of 15 mg, 0.75 mg/kg in 30 minutes, not to exceed 50 mg, and 0.5 mg/kg, up to 35 mg, over  
434 the next 60 minutes combined with intravenous heparin. This means that an average patient,  
435 weighting 75 kg, would receive a total of 100 mg alteplase (the maximum dose).<sup>36</sup> The total  
436 dose used in the effective landmark alteplase trials for ischemic stroke was 0.9 mg/kg,  
437 including a 10% bolus. An average patient, weighing 75 kg, would receive a total of 67.5 mg,  
438 which comes down to 67.5% of the GUSTO dose in an average person.<sup>2, 8, 41</sup> Considering the  
439 intrinsically increased risk of intracranial hemorrhage after thrombolytic treatment in patients  
440 with ischemic stroke compared to patients with MI, we consider it wise to reduce the  
441 cumulative dose of pro-urokinase with 33% by limiting the total duration of infusion to 60  
442 instead of the 90 minutes in the PATENT trial.<sup>35</sup>

## 443 **6.6 Dosages, dosage modifications and method of administration**

444 A bolus of IV alteplase (5 mg), as part of usual care, will be followed by continuous infusion  
445 of m-pro-urokinase, either 40 mg/hr during 60 minutes (=40 mg in total) (initial dose) or an  
446 alternate dose. Depending on the result of interim analyses, the m-pro-urokinase dosage  
447 may be revised to:

- 448 - Higher than the initial dose, by 25% (i.e. 50 mg/hr during 60 minutes)
- 449 - Lower than the initial dose, by 25% (i.e. 30mg/hr during 60 minutes)

450 Standard treatment consists of alteplase alone (0.9mg/kg, with 10% of the total dosage given  
451 as a bolus).

## 452 **6.7 Preparation and labeling of Investigational Medicinal Product**

453 Commercially available preparations of alteplase will be used for bolus and continuous  
454 infusion in 60 minutes, both as part of usual care. The hospital pharmacy of Erasmus MC will  
455 label and store alteplase according to the Good Manufacturing Practice Guideline  
456 (2003/94/EG), as standard protocol for usual care. M-pro-urokinase will be prepared and  
457 labeled by Thrombolytic Science LLC, Boston, USA (TSI). TSI will label the IMP according to  
458 regulations under supervision of the hospital pharmacy of Erasmus MC. M-pro-urokinase will

459 be labeled as HisproUK (brand name). In case new labels are needed for any reason (e.g. to  
460 update the retest date), Erasmus MC will label the IMP according to regulations.

#### 461 **6.8 Drug accountability**

462 M-pro-urokinase will be distributed by the hospital pharmacy of Erasmus MC as described in  
463 appendix 1. Each participating hospital will store the investigational medicinal product (IMP)  
464 under prespecified, secured conditions. The local pharmacies of the participating hospitals  
465 will maintain patient-level drug accountability records for all locally enrolled patients. The  
466 central pharmacy of Erasmus MC will maintain patient-level drug accountability records for  
467 patients enrolled at Erasmus MC and a center-level drug accountability record for the full  
468 trial. Not used m-pro-urokinase will be returned to TSI and used medication will be  
469 destructed by each participating hospital after being accounted for by the study monitor.

470

### 471 **7. NON-INVESTIGATIONAL PRODUCT**

472 This is not applicable for this study.

473

## 474 **8. METHODS**

### 475 **8.1 Study parameters/endpoints**

#### 476 **8.1.1 Main study parameter/endpoint**

477 The primary outcome is any post-intervention intracerebral hemorrhage/hematoma detected  
478 by neuroimaging according to the Heidelberg Bleeding Classification at 24 hours (range: 12  
479 to 48 hours) of study drug administration preferably by MRI (SWI). A detailed classification of  
480 the Heidelberg Bleeding Classification is provided in Table 1.<sup>7</sup> Assessment of any  
481 intracerebral hemorrhage on the Heidelberg Bleeding Classification will be performed by an  
482 independent central core laboratory.

#### 483 **8.1.2 Secondary study parameters/endpoints**

##### 484 *Secondary clinical outcomes*

- 485 - Score on the National Institute of Health Stroke Scale (NIHSS) assessed at 24 hours  
486 (range: 12 to 48 hours) and at 5-7 days post-treatment, or discharge if earlier.<sup>42</sup>
- 487 - Improvement of at least 4 points on NIHSS at 24 hours (range: 12 to 48 hours)  
488 compared to baseline, or (near) complete recovery (NIHSS 0 or 1).
- 489 - Score on the modified Rankin Scale (mRS) assessed at 30 days (-7 days or +14  
490 days) post-treatment.<sup>43</sup>
- 491 - All possible dichotomizations of the mRS as assessed at 30 days (-7 or +14 days)  
492 post-treatment. This includes complete recovery (mRS 0 vs 1-6), excellent functional

493 outcome (mRS 0-1 vs 2-6), good functional outcome (mRS 0-3 vs 4-6), and  
494 handicapped survival (mRS 0-4 vs 5-6) and survival in any condition (mRS 0-5 vs 6).

495

496 *Secondary neuroimaging outcomes*

- 497 - Infarct volume measured with MRI (DWI) at 24 hours (range: 12 to 48 hours) post-  
498 treatment.
- 499 - Change (pre-treatment vs. post-treatment) in abnormal perfusion volume based on  
500 TTP/MTT maps measured with CT perfusion at baseline and MRI at 24 hours (range  
501 12 to 48 hours) post treatment.

502

503 *Secondary blood biomarker outcomes*

- 504 - Secondary blood biomarkers of thrombolysis within 1 hour post-treatment, after 3  
505 hours and after 24 hours post-treatment, including d-dimers and fibrinogen.
- 506 - Change in blood biomarkers of thrombolysis from baseline to 24 hours, including d-  
507 dimers and fibrinogen.

508

509 *Safety outcomes*

- 510 - Symptomatic intracranial hemorrhage (sICH) according to the Heidelberg Bleeding  
511 Classification within the follow-up period defined by the last follow-up contact at 30  
512 days.<sup>7</sup>
- 513 - Death from any cause including intracranial hemorrhage within the follow-up period  
514 defined by the last follow-up contact at 30 days (-7 days or +14 days) (this is  
515 equivalent to handicapped survival (mRS 0-4 vs 5-6) and survival in any condition  
516 (mRS 0-5 vs 6).
- 517 - Major extracranial hemorrhage according to the ISTH criteria within 24 hours of study  
518 drug administration.<sup>44</sup>

519

**8.1.3 Other study parameters**

520 Baseline parameters that will be recorded include age, sex, pre-stroke mRS; previous stroke;  
521 conditions such as hypertension, diabetes mellitus, atrial fibrillation, myocardial infarction;  
522 smoking status; medication including antihypertensive treatment, antiplatelet agents and  
523 anticoagulants; vital parameters such as blood pressure, heart rate, body temperature;  
524 weight and height; neurological examination including NIHSS; laboratory examination  
525 including INR, APTT, C-reactive protein, glucose, creatinine, fibrinogen, plasminogen, alpha-  
526 2-antiplasmin, D-dimers, and imaging results on admission including ASPECTS on NCCT  
527 and CT-perfusion parameters.

528 We will record the administered dose of alteplase and timing of IVT medication. To monitor  
529 the workflow we will record time of symptom onset, time from symptom onset to: ER,  
530 imaging, randomization and IVT.

### 531 **8.2 Randomization, blinding and treatment allocation**

532 Patients will be randomized to standard treatment with alteplase alone vs. dual thrombolytic  
533 treatment with bolus alteplase + m-pro-urokinase (1:1). During the study, the m-pro-  
534 urokinase dosage may be revised, randomization will remain the same. Patients will be  
535 randomized after CTA (exclusion of a large vessel occlusion) at the emergency department.  
536 The randomization procedure will be computer- and web-based, using permuted blocks.  
537 Block size will not be revealed to investigators and study personnel. Back-up by telephone  
538 will be provided. Randomization will be stratified for center.

### 539 **8.3 Study procedures**

540 All patients will undergo assessment of the NIHSS at baseline, 24 hours (range: 12 hours to  
541 48 hours) and 5-7 days (or discharge if earlier), which is routine in clinical procedure. It will  
542 be carried out by certified assessors. All patients will undergo NCCT, CT-angiography and  
543 CT-perfusion or MRI/MRA of the brain at baseline, as part of routine clinical care. The CT-  
544 perfusion should be focused on the anterior circulation or posterior circulation depending on  
545 the suspected location of the ischemic stroke as determined by the neurology assistant or  
546 neurologist. For follow-up, all patients will undergo an MRI-scan of the brain at 24 hours  
547 (range: 12 to 48) hours). The MRI-scan will include the following sequences: 1) T2w-TSE, 2)  
548 3D-T2w-FLAIR, 3) DWI/ADC, 4) SWI. 5) DSC-PW MRI, 6) 3D-T1w without and with  
549 gadolinium. In the event of any contra-indication for an MRI after randomization (e.g.  
550 because the contra-indication was not known at the time of inclusion or the patient has a new  
551 contra-indication due to an intervention during hospital admission or stay), a follow-up NCCT  
552 and CT-perfusion at 24 hours (range: 12 to -48 hours) will be performed instead. Intracranial  
553 hemorrhage will be assessed on SWI. Infarct volume will be assessed on DWI. Follow-up  
554 with MRI is not part of usual care in every hospital. Blood samples will be taken at baseline,  
555 one tube EDTA (+/- 5 mL), one tube without anticoagulant (+/- 7mL) and two tubes citrated  
556 blood (2.7 mL) will be drawn. Additional blood samples will be taken (two tubes citrated blood  
557 of 2.7 mL) within 1 hour, after 3 hours and 24 hours post treatment. Biomaterials will not be  
558 collected for all patients. This will only be collected for patients in some participating centers.  
559 Plasma samples will be stored at -80 degrees Celsius for later analysis. A schedule of all  
560 activities is shown in Table 2.

### 561 **8.4 Withdrawal of individual subjects**

562 Subjects can leave the study at any time for any reason if they wish to do so without any  
563 consequences. The investigator can decide to withdraw a subject from the study for urgent



564 medical reasons. Data and biomaterials from non-consenting subjects will not be used when  
565 there is a written objection from the subject or representative. In an effort to describe the  
566 non-consenting population we will ask the subject or his/her representative to allow the use  
567 of routinely collected data and materials in a coded manner. If no consent for the use of  
568 these data is obtained, only study number, treatment allocation and refusal will be noted.  
569 Safety parameters of these withdrawn subjects will also be collected and analyzed. Other  
570 missing data, including any intracerebral hemorrhage, will be imputed for the main analysis,  
571 by multiple imputation.

### 572 **8.5 Replacement of individual subjects after withdrawal**

573 An additional patient will be included (i.e, replaced) for each patient who

- 574 - did not give consent for participation in the study, or
- 575 - for any reason did not receive the full dose of thrombolytics as assigned, or
- 576 - had a discharge diagnosis other than ischemic stroke (e.g. stroke mimic),
  - 577 o We estimate that up to 20% of the included patients will not have a diagnosis
  - 578 of ischemic stroke at discharge.<sup>9</sup>

579 Replacement of these patients will provide us sufficient power in the targeted modified on-  
580 treatment analysis.

### 581 **8.6 Follow-up of subjects withdrawn from treatment**

582 All patients in the study will be followed until final assessment at 30 days. Patients who do  
583 not give or have withdrawn consent will be assessed immediately and their records will be  
584 closed. The deferred consent procedure allows treatment with study medication before  
585 consent has been obtained. Complete elimination of all data from these patients would likely  
586 result in biased estimates of the safety of the study drug. To overcome this concern, we will  
587 register in a strictly anonymized safety cohort for all patients – irrespective of whether a  
588 patient has provided written informed consent – only the variables: patient’s study number,  
589 study treatment, in-hospital symptomatic intracranial hemorrhage occurrence (yes/no), in-  
590 hospital death (yes/no). All other information will completely be erased from the patients’  
591 study record. The link to the study database will be erased from the medical record.

### 592 **8.7 Premature termination of the study**

593 The study will only be terminated prematurely if the Data and Safety Monitoring Board  
594 recommends discontinuation of the study, see Section 9.5. In case of premature termination  
595 of the study the database will be closed 90 days after assessment of the last enrolled patient  
596 and results will be reported.

597

## 598 9. SAFETY REPORTING

### 599 9.1 Temporary halt for reasons of subject safety

600 In accordance to section 10, subsection 4, of the WMO, the sponsor will suspend the study if  
601 there is sufficient ground that continuation of the study will jeopardize subject health or  
602 safety. The assessment of sufficient ground will be based on the advice of the DSMB. The  
603 sponsor will notify the accredited METC without undue delay of a temporary halt including  
604 the reason for such an action. The study will be suspended pending a further positive  
605 decision by the accredited METC. The investigator will take care that all subjects are kept  
606 informed.

### 607 9.2 AEs, SAEs and SUSARs

#### 608 9.2.1 Adverse events (AEs)

609 Adverse events are defined as any undesirable experience occurring to a subject during the  
610 study, whether or not considered related to the investigational product. All adverse events  
611 reported spontaneously by the subject or observed by the investigator or his staff will be  
612 recorded.

#### 613 9.2.2 Serious adverse events (SAEs)

614 A serious adverse event is any untoward medical occurrence or effect that

- 615 - results in death;
- 616 - is life threatening (at the time of the event);
- 617 - requires hospitalization or prolongation of existing inpatients' hospitalization;
- 618 - results in persistent or significant disability or incapacity;
- 619 - is a congenital anomaly or birth defect;
- 620 - that required medical or surgical intervention.

621 Any other important medical event that did not result in any of the outcomes listed above  
622 due to medical or surgical intervention but could have been based upon appropriate medical  
623 judgement. An elective hospital admission will not be considered as a serious adverse event.

624 Serious adverse events will be immediately after coming to notice of the investigator  
625 reported to the trial coordinator, who is 24/7 available. We will report SAEs that occurred  
626 within the follow-up period defined by the last follow-up contact.

627 The investigator will report the following SAEs occurring in the study period to the sponsor  
628 without undue delay of obtaining knowledge of the events: Death from any cause;  
629 symptomatic intracranial hemorrhage, extracranial hemorrhage, cardiac ischemia,  
630 pneumonia, allergic reactions, new ischemic stroke in a different vascular territory.

631 Technical complications that do not lead to clinically detectable SAE and neurological  
632 deterioration not caused by intracranial hemorrhage, new ischemic stroke, are considered as  
633 consistent with the natural course of the ischemic stroke, will not be reported immediately.

634 The sponsor will report the SAEs through the web portal *ToetsingOnline* to the accredited  
635 METC that approved the protocol, within 7 days of first knowledge for SAEs that result in  
636 death or are life threatening followed by a period of maximum of 8 days to complete the initial  
637 preliminary report. All other SAEs will be reported within a period of maximum 15 days after  
638 the sponsor has first knowledge of the serious adverse events.

### 639 **9.2.3 Suspected unexpected serious adverse reactions (SUSARs)**

640 Adverse reactions are all untoward and unintended responses to an investigational product  
641 related to any dose administered.

642 Unexpected adverse reactions are SUSARs if the following three conditions are met:

- 643 1. the event must be serious (see chapter 9.2.2);
- 644 2. there must be a certain degree of probability that the event is a harmful and an  
645 undesirable reaction to the medicinal product under investigation, regardless of  
646 the administered dose;
- 647 3. the adverse reaction must be unexpected, that is to say, the nature and severity  
648 of the adverse reaction are not in agreement with the product information as  
649 recorded in:
  - 650 - Summary of Product Characteristics (SPC) for an authorised medicinal  
651 product;
  - 652 - Investigator's Brochure for an unauthorised medicinal product.

653 The sponsor will report expedited the following SUSARs through the web portal  
654 *ToetsingOnline* to the METC:

- 655 - SUSARs that have arisen in the clinical trial that was assessed by the METC;  
656 SUSARs that have arisen in other clinical trials of the same sponsor and with the same  
657 medicinal product, and that could have consequences for the safety of the subjects involved  
658 in the clinical trial that was assessed by the METC.

659 The remaining SUSARs are recorded in an overview list (line-listing) that will be submitted  
660 once every half year to the METC. This line-listing provides an overview of all SUSARs from  
661 the study medicine, accompanied by a brief report highlighting the main points of concern.  
662 The expedited reporting of SUSARs through the web portal Eudravigilance or *ToetsingOnline*  
663 is sufficient as notification to the competent authority.

664 We will report SUSARs that occurred within the follow-up period defined by the last follow-up  
665 contact.

666 The sponsor will report expedited all SUSARs to the competent authorities in other Member  
667 States, according to the requirements of the Member States.

668 The expedited reporting will occur not later than 15 days after the sponsor has first  
669 knowledge of the adverse reactions. For fatal or life threatening cases the term will be  
670 maximal 7 days for a preliminary report with another 8 days for completion of the report.

### 671 **9.3 Annual safety report**

672 In addition to the expedited reporting of SUSARs, the sponsor will submit, once a year  
673 throughout the clinical trial, a safety report to the accredited METC, competent authority, and  
674 competent authorities of the concerned Member States.

675 This safety report consists of:

- 676 – a list of all suspected (unexpected or expected) serious adverse reactions, along with  
677 an aggregated summary table of all reported serious adverse reactions, ordered by  
678 organ system, per study;
- 679 – a report concerning the safety of the subjects, consisting of a complete safety analysis  
680 and an evaluation of the balance between the efficacy and the harmfulness of the  
681 medicine under investigation.

### 682 **9.4 Follow-up of adverse events**

683 All AEs will be followed until they have abated, or until a stable situation has been reached.  
684 Depending on the event, follow up may require additional tests or medical procedures as  
685 indicated, and/or referral to the general physician or a medical specialist. SAEs need to be  
686 reported until end of study within the Netherlands, as defined in the protocol

### 687 **9.5 Data Safety Monitoring Board (DSMB)**

688 In order to increase the safety of the intervention, the trial will be monitored by an  
689 independent data safety monitoring board (DSMB). The DSMB, consisting of a neurologist  
690 with sufficient neuroradiological expertise, neuroradiologist, and hematologist, will advise the  
691 chairman of the Steering Committee if analyses of safety and efficacy raise an ethical  
692 concern with regard to continuation of the trial. The DSMB will advise the chairman of the  
693 Steering Committee if, in their view, the randomized comparisons have provided both (i)  
694 'proof beyond reasonable doubt' that for all, or some, the treatment is clearly indicated or  
695 clearly contra-indicated and (ii) evidence that might reasonably be expected to materially  
696 influence future patient management. Appropriate criteria of proof beyond reasonable doubt  
697 cannot be specified precisely, but the DSMB will work on the principle that a difference of at  
698 least 3 standard errors in an interim analysis of a major outcome event (e.g. any intracranial  
699 hemorrhage, death) may be needed to justify halting, or modifying, a study before the  
700 planned completed recruitment. This criterion has the practical advantage that the exact  
701 number of interim analyses would be of little importance, but we suggest safety analyses

702 (death and symptomatic ICH) after inclusion of 20, 30 40 and 50 patients and after that with  
703 increments of 50, after start of the trial and after any dose change, until the trial is completed,  
704 unless the DSMB advises otherwise during the conduct of the trial. These analyses will also  
705 include measures of efficacy (NIHSS scores). Following a report from the DMSB, the  
706 steering committee will decide whether to modify entry to the study (or seek extra data) and  
707 inform the sponsor. Unless this happens however, the Steering Committee, the collaborators  
708 and central administrative staff will remain ignorant of these analyses and results.

709 Apart from these safety and efficacy reports, the DSMB will receive additional analyses  
710 from an independent statistician, that will inform the DSMB on the likelihood of success or  
711 failure of the study to reach a positive result as defined in the sample size calculation. This  
712 information will be used to advise the Steering Committee to adapt the dosing in the study  
713 according to pre-specified criteria, see section 10.3. The information provided by the interim  
714 analysis will not be used to discontinue the study for expected futility, as it is the intention of  
715 the steering committee to run the trial until 200 patients with a discharge diagnosis of  
716 ischemic stroke have been included, as long as there are no safety or efficacy concerns, as  
717 described earlier.

718 The advice(s) of the DSMB will be sent to the chair of the Steering Committee, who will  
719 inform both the PIs and the sponsor of the study. Should the Steering Committee decide not  
720 to fully implement the advice of the DSMB, the Steering Committee will send the advice to  
721 the reviewing METC, including a note to substantiate why (part of) the advice of the DSMB  
722 will not be followed.

## 723 **10. STATISTICAL ANALYSIS**

724 Baseline data by treatment allocation will be reported with standard statistical procedures.  
725 Missing values will be reported. Missing values, except the primary outcome, will be imputed  
726 using multiple imputation (n=5). We will perform and report 4 analyses, of which the first is  
727 the main and primary, and will be reported as such (figure 2):

- 728 1. Simple modified intention-to-treat analysis to assess overall safety and efficacy. This is a  
729 modified intention-to-treat analysis because we exclude patients who did not give  
730 consent to participate in the study. We will additionally report safety parameters based on  
731 the full cohort, including patients who did not give consent.
- 732 2. Targeted modified intention-to-treat analysis excluding patients with a discharge diagnosis  
733 other than ischemic stroke to assess safety and efficacy in the target population.
- 734 3. Targeted modified on-treatment analysis to assess the safety and efficacy in patients who  
735 actually received the treatment excluding patients with a discharge other than ischemic  
736 stroke.
- 737 4. Per-protocol analysis.

738 Additionally we will perform subgroup analyses, by age, sex, systolic blood pressure,  
739 ASPECTS, time from onset to study treatment, NIHSS score, extracranial carotid or vertebral  
740 arterial occlusion, pre-study antiplatelet treatment, DWI lesion (yes/no), and lacunar  
741 syndrome (yes/no).

#### 742 **10.1 Primary study parameter(s)**

743 The effect of the study treatment on the primary outcome will be assessed with multivariable  
744 logistic regression modeling with study treatment as a binary independent variable (m-pro-  
745 urokinase vs. control). The effect parameter is an odds ratio (OR) with 95% confidence  
746 interval (CI). This effect estimate will be adjusted for important prognostic factors at baseline,  
747 which include age, pre-stroke mRS, time from onset of symptoms to randomization, stroke  
748 severity (NIHSS), lacunar syndrome (yes/no)<sup>25</sup> systolic blood pressure, pre-study antiplatelet  
749 treatment and indication for endovascular treatment (yes/no). Whether the dosing (initial vs.  
750 modified) of the study treatment modifies the treatment effect, will be analyzed with a  
751 multiplicative interaction parameter in the main analysis. Adjusted and unadjusted effect  
752 estimates with corresponding 95% confidence intervals will be reported.

#### 753 **10.2 Secondary study parameter(s)**

754 The effect of the study treatment on the secondary outcomes will be assessed with  
755 multivariable linear, logistic or ordinal regression modeling with study treatment as a binary  
756 independent variable (either dose of m-pro-urokinase vs. control). The effect parameter will  
757 be either a beta or (common) OR with 95% CI. This effect will be adjusted with the same  
758 adjustment variables as the primary outcome (see above).

759 Pre-specified subgroup analyses will be performed by specific baseline characteristic and  
760 treatment.

#### 761 **10.3 Interim analysis**

##### 762 *Interim analysis for dose optimization*

763 The trial includes a pre-specified rule for adaptation of the IV m-pro-urokinase dose, with the  
764 goal of finding the optimal dose of m-pro-urokinase. After inclusion of 60 patients with a  
765 discharge diagnosis of ischemic stroke and every 20 patients with a discharge diagnosis of  
766 ischemic stroke thereafter, the DSMB will advise the Steering Committee about reverting to a  
767 second therapeutic regimen, i.e. alternate dose, see Section 6.6. Only a switch back to the  
768 original dose is allowed. The total number of different dosages used in the trial will therefore  
769 not exceed two, in order to retain sufficient precision in the estimate of dose related  
770 treatment effect.

771 The decision to revert to an alternate dose will depend on the estimated likelihood that the  
772 intervention will not lead to safer treatment (i.e. lower rate of any ICH) and the estimated  
773 likelihood that the intervention will lead to decreased likelihood of good outcome compared to

774 standard treatment, as measured by the change (decrease) in NIHSS. Computations will be  
775 based on a Bayesian analytic model, see appendix. We will not use an alpha spending  
776 approach, because the interim analysis will not be performed with the intention to terminate  
777 the trial at an early stage.

778

779 *Interim analyses by the DSMB*

780 See Section 9.5.

781

## 782 **11. ETHICAL CONSIDERATIONS**

### 783 **11.1 Regulation statement**

784 The study will be conducted in compliance with this protocol and according to the principles  
785 of the Declaration of Helsinki (October 2013),<sup>45</sup> ICH-GCP principles (International council for  
786 harmonisation of technical requirements for pharmaceuticals for human use (ICH), and in  
787 accordance with the Medical Research Involving Human Subjects Act (WMO).

### 788 **11.2 Recruitment and consent**

789 For every 15 minutes of delay of IV thrombolytic treatment, the likelihood of a beneficial  
790 outcome is reduced by 1% (absolute risk difference). The new treatment is comparable to the  
791 standard treatment, alteplase. It has an improved safety profile in ex- and in-vivo  
792 experimental studies and in a clinical study in myocardial infarction and similar effectiveness.  
793 The informed consent procedure takes on average one hour, both in proxies and in stroke  
794 patients themselves. Additionally, approximately all patients with ischemic stroke have  
795 neurological deficits interfering with their decision-making capacity. Representatives are  
796 often not directly on the scene, and if they are, there is no time for a proper informed consent  
797 procedure, which takes at least 1 hour. Also, it is almost never possible for a relative to make  
798 a well thought-through decision in this emergency situation, which is characterized by high  
799 emotional strain. We will therefore defer consent and ask for written informed consent as  
800 early as deemed appropriate according to the treating physician. We aim to ask for written  
801 informed consent as early as possible.

802 At the time of deferred consent, subjects or their representatives will be provided with a  
803 patient information form and verbal explanation of the purpose of the study. They will be  
804 informed about the inclusion in the trial, data and biomaterials that have been collected, and  
805 treatment they may have received. They will be asked for consent in follow-up and data  
806 usage. Participation in this trial is voluntary. Patients or their legal representatives will have  
807 ample time (several hours) to decide whether they want to continue participation in the study.  
808 When the patient is not competent and no representative is available or present, we will stop  
809 the study procedures until we can inform the representative and ask for consent. When

810 consent by proxy (i.e., legal representative) has been obtained and the patient recovers, we  
811 will again ask for written consent from the patient. The patient or representative may, at any  
812 given time, withdraw informed consent. An explanation is not needed. If a patient has died  
813 before deferred consent has been obtained, his/her representative will be informed about the  
814 study treatment the patient may have received, trial procedures and use of the collected data  
815 and biomaterials. These patients will be included in all analyses, there is no opt-out option  
816 since that may bias results. A separate information form will be sent to the representative by  
817 the medical center where the patient last resided.

### 818 **11.3 Objection by minors or incapacitated subjects**

819 Minors (patients of 18 years old and less) will not be included in the trial. Patients eligible for  
820 the trial have acquired neurological deficits due to the stroke, which may interfere with their  
821 decision-making capacity. We will follow the procedure as described in 11.2. In the situation  
822 that a legally incompetent patient shows behavior suggesting objection to participate in the  
823 trial, the patient will be not be included in the study. The investigators will adhere to the  
824 following code of conduct: 'Verzet bij wilsonbekwame (psycho) geriatrische patiënten in het  
825 kader van de Wet Medisch-Wetenschappelijk Onderzoek met  
826 Mensen'(http://wetten.overheid.nl/BWBR0009408/2017-03-01).

### 827 **11.4 Benefits and risks assessment, group relatedness**

828 All patients included in the trial will receive usual care, including indicated interventions. The  
829 main complication of thrombolytic therapy for acute ischemic stroke is intracranial  
830 hemorrhage. Dual thrombolytic therapy with m-pro-urokinase and a small bolus of alteplase  
831 has a significant potential to be safer and more efficacious than alteplase alone. The  
832 Executive Committee expects that the potential benefits of dual thrombolytic therapy  
833 outweigh the limited risk of harm of the study treatment. We refer to the chapters 6 and 13.1  
834 for more details on these potential benefits and harms.

### 835 **11.5 Compensation for injury**

836 Each participating center has a liability insurance, which is in accordance with article 7 of the  
837 WMO. The sponsor, Erasmus MC, also has an insurance which is in accordance with the  
838 legal requirements in the Netherlands (Article 7 WMO). This insurance provides cover for  
839 damage to research subjects through injury or death caused by the study. The insurance  
840 applies to the damage that becomes apparent during the study or within 4 years after the end  
841 of the study.

842



843 **12. ADMINISTRATIVE ASPECTS, MONITORING AND PUBLICATION**844 **12.1 Handling and storage of data and documents**

845 All data will be entered into a web-based database (OpenClinica), by local research  
 846 personnel. Subject records are coded by a unique study number. The local investigators will  
 847 keep a list showing codes and names. Unique documents with identifying information will be  
 848 stored separately from the study database in digital files, categorized by study number on a  
 849 secure drive system, only accessible to the study coordinator.

850 **12.2 Monitoring and Quality Assurance**

851 The level of monitoring meets the standards set by CCMO (Central Committee for Research  
 852 in Humans) and Erasmus MC. As required, per GCP, the investigator(s)/institution(s) will  
 853 permit trial-related monitoring, audits, METC review, and regulatory inspection(s), and will  
 854 provide direct access to source data/documentation to monitor, regulatory agency and  
 855 DSMB. This trial qualifies as a moderate risk study, i.e. a study with a small risk of serious  
 856 adverse events compared to standard treatment. This implies that the level of monitoring  
 857 should be at least as follows:

|                                      |                                                                               |
|--------------------------------------|-------------------------------------------------------------------------------|
| Monitoring frequency                 | At least 2-3 visits per center annually                                       |
| Monitoring of Patient inclusion      | Rate of inclusions                                                            |
| Trial Master File/ investigator file | Completeness                                                                  |
| Informed consent                     | In 100% of cases                                                              |
| In and exclusion criteria            | in 100% of cases                                                              |
| Source data verification             | In 100%, based on a predefined list of variables.                             |
| Protocol compliance                  | in 100% of cases, based on a predefined item list.                            |
| SAE and SUSARs                       | 100% SAEs + SUSARs: screening for missed SAEs and verification of procedures. |
| Study medication                     | Dosing and completion of infusion in 100% of cases.                           |
| Study procedures                     | Check instructions for personnel                                              |
| Laboratories and pharmacy            | Check GLP/GMP certification                                                   |
| Biological samples (blood)           | Check admin, labeling and storage conditions                                  |

858

859 Source data verification and protocol compliance includes deferred informed consent, NIHSS  
860 at baseline and performance of baseline and follow-up imaging (includes the primary  
861 endpoint), blood sampling and clinical assessment.

### 862 **12.3 Amendments**

863 A 'substantial amendment' is defined as an amendment to the terms of the METC  
864 application, or to the protocol or any other supporting documentation, that is likely to affect to  
865 a significant degree:

- 866 - the safety or physical or mental integrity of the subjects of the trial;
- 867 - the scientific value of the trial;
- 868 - the conduct or management of the trial; or
- 869 - the quality or safety of any intervention used in the trial.

870 All substantial amendments will be notified to the METC and to the competent authority. Non-  
871 substantial amendments will not be notified to the accredited METC and the competent  
872 authority, but will be recorded and filed by the sponsor.

### 873 **12.4 Annual progress report**

874 The sponsor/investigator will submit a summary of the progress of the trial to the accredited  
875 METC once a year. Information will be provided on the date of inclusion of the first subject,  
876 numbers of subjects included and numbers of subjects that have completed the trial, serious  
877 adverse events/ serious adverse reactions, other problems, and amendments.

### 878 **12.5 Temporary halt and (prematurely) end of study report**

879 The sponsor will notify the accredited METC and the competent authority of the end of the  
880 study within a period of 90 days. The end of the study is defined as the last patient's last visit.  
881 The sponsor will notify the METC immediately of a temporary hold of the study, including the  
882 reason of such an action. In case the study is ended prematurely, the sponsor will notify the  
883 accredited METC and the competent authority within 15 days, including the reasons for the  
884 premature termination. Within one year after the end of the study, the investigator/sponsor  
885 will submit a final study report with the results of the study, including any  
886 publications/abstracts of the study, to the accredited METC and the Competent Authority.

### 887 **12.6 Public disclosure and publication policy**

888 The trial is registered as NL749 (NTR 7634) at [www.trialregister.nl](http://www.trialregister.nl), and as NCT04256473 at  
889 [www.clinicaltrials.gov](http://www.clinicaltrials.gov).

890 The study database will be closed within one month after the last scheduled follow-up date of  
891 the last included patient. A first report of final results will be drafted within 2 months after  
892 completion of follow-up of the last patient and presented to the Sponsor, Erasmus MC, who

893 may comment on it but cannot alter its contents or decide on publication. The manuscript will  
894 be submitted for publication 3 months after presentation to the Sponsor.

895 Anonymous data can be requested from the PI with a detailed description containing the  
896 aims and methods of the study for which the data are intended to be used. Data will be made  
897 available for this purpose at least 18 months after publication of the main report. Data may  
898 also be shared with non-commercial parties for scientific purposes, including individual  
899 patient meta-analyses, and with commercial parties for FDA approval. Consent will be asked  
900 specifically for these purposes.

901

## 902 **13. STRUCTURED RISK ANALYSIS**

### 903 **13.1 Potential issues of concern**

#### 904 a. Level of knowledge about mechanism of action

905 The intervention concerns dual thrombolytic therapy (low dose alteplase and m-pro-  
906 urokinase) for acute ischemic stroke. M-pro-urokinase is more stable than pro-urokinase and  
907 therefore less likely to convert to nonspecific urokinase. M-pro-urokinase targets primarily  
908 degraded fibrin, which is why previous administration with alteplase is necessary.

909 Experimental studies with m-pro-urokinase, suggest a higher fibrinolytic effect and confirm  
910 that, m-pro-urokinase by itself, in the absence of alteplase in the systemic circulation does  
911 not lyse hemostatic fibrin. However, everywhere where alteplase is bound to plasminogen,  
912 activation of m-pro-urokinase may occur.

913 The main risk with alteplase in acute ischemic stroke is hemorrhage. Dual thrombolytic  
914 therapy has the potential to be safer, because alteplase will have almost completely  
915 disappeared from the systemic circulation within 20 minutes, as alteplase has a plasma half-  
916 life of 4-5 minutes),{Acheampong, 2012 #304} and in the absence of alteplase, mutant pro-  
917 urokinase will not be activated. On the other hand, alteplase binds to PAI-1, by which it is de-  
918 activated, and to the plasminogen – fibrin complex, where it will promote release of plasmin,  
919 which in its turn breaks down fibrin, but also fibrinogen.<sup>31</sup> The half-life of the alteplase-  
920 plasminogen complex is not well known, but it is considerably longer than the half-life of  
921 alteplase in the systemic circulation.<sup>32</sup>

922 The exact side effects of dual thrombolytic therapy with low dose alteplase and m-pro-  
923 urokinase, as applied in this trial, are unknown but their frequency is expected to be low as  
924 described above. Treatment benefit is expected to outweigh the occurrence and severity of  
925 this potential side effect. Detailed information is described in the investigator's brochure and  
926 the investigational medicinal product dossier.

927 b. Previous exposure of human beings with the test product(s) and/or products with a  
928 similar biological mechanism

929 See Section 6.3.

930 c. Can the primary or secondary mechanism be induced in animals and/or in ex-vivo  
931 human cell material?

932 M-pro-urokinase has a high affinity for plasminogen, after plasminogen has undergone a  
933 conformational change by binding to fibrin fragment E domains. The fibrin fragment E  
934 domains are only present on degraded fibrin. When tissue plasminogen activator binds to  
935 (intact) fibrin, it forms a ternary complex with plasminogen and initiates fibrinolysis. This  
936 creates new plasminogen binding sites, principally the one of the fibrin fragment E domain.  
937 Effective clot lysis with low dose alteplase and m-pro-urokinase has been shown in human  
938 plasma in vitro.<sup>22</sup> A study in dogs showed a better clot specific lysis and less bleeding from  
939 hemostatic sites compared with tissue plasminogen activator.<sup>21</sup> Moreover, pro-urokinase is  
940 well studied and has shown good reperfusion rates in both myocardial infarction and as intra-  
941 arterial treatment in ischemic stroke, despite an increased rate of intracranial hemorrhage.<sup>33-  
942 <sup>35</sup></sup>

943 d. Selectivity of the mechanism to target tissue in animals and/or human beings

944 See Section 13.1c.

945 e. Analysis of potential effect

946 See Section 13.1c.

947 f. Pharmacokinetic considerations

948 M-pro-urokinase shares the basic physical, biochemical and pharmacokinetic properties as  
949 pro-urokinase. However, it is more stable in plasma at higher concentrations than pro-  
950 urokinase, due to the mutation which reduces the intrinsic activity. M-pro-urokinase is  
951 predominantly cleared by the liver with an half-life of 11-12 minutes. IV administration of m-  
952 pro-urokinase at therapeutic dosages healthy volunteers has been shown safe and does not  
953 result in bleeding or fibrinogen depletion (see appendix).

954 g. Study population

955 All included patients are suffering from ischemic stroke, which is a life-threatening disease.  
956 Detailed information is described in Section 4.

957 h. Interaction with other products

958 Not applicable.

959 i. Predictability of effect

960 Any intracranial hemorrhage will be assessed with MRI (SWI), which is more sensitive for  
961 hemorrhage compared with CT. All neuro-imaging will be evaluated by an imaging  
962 committee. Also, blood biomarkers of thrombolysis will be determined for safety.

963 j. Can effects be managed?

964 No antidotes or antagonists are available, however these are not available for usual  
965 treatment with alteplase either. Also, the half-life of both drugs is short, so it is unknown  
966 whether an antidote or antagonist would be beneficial for the patient.

967 If a patient has neurological deterioration based on intracranial hemorrhage, while still  
968 receiving the infusion of m-pro-urokinase or alteplase, the infusion will be stopped.

969 **13.2 Synthesis**

970 The only FDA-approved thrombolytic agent for thrombolytic treatment of ischemic stroke,  
971 alteplase, has a limited effectiveness and carries a risk of symptomatic intracerebral  
972 hemorrhage of 6-7%.<sup>1, 2, 41</sup> There is a need for a better and safer thrombolytic therapy, that  
973 expands the number of patients that will be treated safely and successfully. Since dual  
974 thrombolytic therapy has a significant potential to be safer and more efficacious than  
975 alteplase alone, it is important to assess this thrombolytic therapy.

976 The dose of m-pro-urokinase will be reduced with 33% and the total duration will be  
977 limited to 60 minutes instead of 90 minutes, compared with the PATENT trial which  
978 evaluated pro-urokinase in myocardial infarction.<sup>35</sup> Because trials of fibrinolytic treatment that  
979 used similar doses of the drug as were used in trials of fibrinolytic treatment of acute  
980 myocardial infarction reported high rates of intracranial hemorrhage, and no beneficial effect  
981 of treatment on functional outcome.<sup>39-41</sup> Also, blood biomarkers of thrombolysis will be  
982 measured, including d-dimers and fibrinogen levels.

983

984 **14. REFERENCES**

- 985 1. Wardlaw JM, Murray V, Berge E, del Zoppo GJ. Thrombolysis for acute ischaemic stroke.  
986 Cochrane Database of Systematic Reviews. 2014:CD000213
- 987 2. National Institute of Neurological D, Stroke rt PASSG. Tissue plasminogen activator for  
988 acute ischemic stroke. *N Engl J Med.* 1995;333:1581-1587
- 989 3. Hacke W, Kaste M, Bluhmki E, Brozman M, Davalos A, Guidetti D, et al. Thrombolysis  
990 with alteplase 3 to 4.5 hours after acute ischemic stroke. *N Engl J Med.* 2008;359:1317-1329
- 991 4. Thomalla G, Simonsen CZ, Boutitie F, Andersen G, Berthezene Y, Cheng B, et al. Mri-  
992 guided thrombolysis for stroke with unknown time of onset. *N Engl J Med.* 2018;379:611-622
- 993 5. Ma H, Campbell BCV, Parsons MW, Churilov L, Levi CR, Hsu C, et al. Thrombolysis  
994 guided by perfusion imaging up to 9 hours after onset of stroke. *N Engl J Med.*  
995 2019;380:1795-1803
- 996 6. Hansen CK, Christensen A, Ovesen C, Havsteen I, Christensen H. Stroke severity and  
997 incidence of acute large vessel occlusions in patients with hyper-acute cerebral ischemia:  
998 Results from a prospective cohort study based on ct-angiography (cta). *Int J Stroke.*  
999 2015;10:336-342
- 1000 7. von Kummer R, Broderick JP, Campbell BC, Demchuk A, Goyal M, Hill MD, et al. The  
1001 heidelberg bleeding classification: Classification of bleeding events after ischemic stroke and  
1002 reperfusion therapy. *Stroke.* 2015;46:2981-2986
- 1003 8. Hacke W, Kaste M, Fieschi C, von Kummer R, Davalos A, Meier D, et al. Randomised  
1004 double-blind placebo-controlled trial of thrombolytic therapy with intravenous alteplase in  
1005 acute ischaemic stroke (ecass ii). Second european-australasian acute stroke study  
1006 investigators. *Lancet.* 1998;352:1245-1251
- 1007 9. Logallo N, Novotny V, Assmus J, Kvistad CE, Alteheld L, Ronning OM, et al.  
1008 Tenecteplase versus alteplase for management of acute ischaemic stroke (nor-test): A phase  
1009 3, randomised, open-label, blinded endpoint trial. *Lancet Neurol.* 2017;16:781-788
- 1010 10. van Kranendonk KR, Treurniet KM, Boers AMM, Berkhemer OA, van den  
1011 Berg LA, Chalos V, et al. Hemorrhagic transformation is associated with poor functional  
1012 outcome in patients with acute ischemic stroke due to a large vessel occlusion. *J Neurointerv*  
1013 *Surg.* 2019;11:464-468
- 1014 11. Menon BK, Saver JL, Prabhakaran S, Reeves M, Liang L, Olson DM, et al.  
1015 Risk score for intracranial hemorrhage in patients with acute ischemic stroke treated with  
1016 intravenous tissue-type plasminogen activator. *Stroke.* 2012;43:2293-2299
- 1017 12. Anderson CS, Robinson T, Lindley RI, Arima H, Lavados PM, Lee TH, et al.  
1018 Low-dose versus standard-dose intravenous alteplase in acute ischemic stroke. *N Engl J*  
1019 *Med.* 2016;374:2313-2323

- 1020 13. Gurewich V, Pannell R, Louie S, Kelley P, Suddith RL, Greenlee R.  
1021 Effective and fibrin-specific clot lysis by a zymogen precursor form of urokinase (pro-  
1022 urokinase). A study in vitro and in two animal species. *J Clin Invest.* 1984;73:1731-1739
- 1023 14. Mori E, Minematsu K, Nakagawara J, Yamaguchi T, Sasaki M, Hirano T, et  
1024 al. Effects of 0.6 mg/kg intravenous alteplase on vascular and clinical outcomes in middle  
1025 cerebral artery occlusion: Japan alteplase clinical trial ii (j-act ii). *Stroke.* 2010;41:461-465
- 1026 15. Nakagawara J, Minematsu K, Okada Y, Tanahashi N, Nagahiro S, Mori E,  
1027 et al. Thrombolysis with 0.6 mg/kg intravenous alteplase for acute ischemic stroke in routine  
1028 clinical practice: The japan post-marketing alteplase registration study (j-mars). *Stroke.*  
1029 2010;41:1984-1989
- 1030 16. Yamaguchi T, Mori E, Minematsu K, Nakagawara J, Hashi K, Saito I, et al.  
1031 Alteplase at 0.6 mg/kg for acute ischemic stroke within 3 hours of onset: Japan alteplase  
1032 clinical trial (j-act). *Stroke.* 2006;37:1810-1815
- 1033 17. Campbell BCV, Mitchell PJ, Churilov L, Yassi N, Kleinig TJ, Dowling RJ, et  
1034 al. Tenecteplase versus alteplase before thrombectomy for ischemic stroke. *N Engl J Med.*  
1035 2018;378:1573-1582
- 1036 18. Huang X, Cheripelli BK, Lloyd SM, Kalladka D, Moreton FC, Siddiqui A, et  
1037 al. Alteplase versus tenecteplase for thrombolysis after ischaemic stroke (attest): A phase 2,  
1038 randomised, open-label, blinded endpoint study. *Lancet Neurol.* 2015;14:368-376
- 1039 19. Huang X, Maclsaac R, Thompson JL, Levin B, Buchsbaum R, Haley EC,  
1040 Jr., et al. Tenecteplase versus alteplase in stroke thrombolysis: An individual patient data  
1041 meta-analysis of randomized controlled trials. *Int J Stroke.* 2016;11:534-543
- 1042 20. Parsons M, Spratt N, Bivard A, Campbell B, Chung K, Miteff F, et al. A  
1043 randomized trial of tenecteplase versus alteplase for acute ischemic stroke. *N Engl J Med.*  
1044 2012;366:1099-1107
- 1045 21. Gurewich V, Pannell R, Simmons-Byrd A, Sarmientos P, Liu JN, Badylak  
1046 SF. Thrombolysis vs. Bleeding from hemostatic sites by a prourokinase mutant compared  
1047 with tissue plasminogen activator. *J Thromb Haemost.* 2006;4:1559-1565
- 1048 22. Liu JN, Liu JX, Liu Bf BF, Sun Z, Zuo JL, Zhang Px PX, et al. Prourokinase  
1049 mutant that induces highly effective clot lysis without interfering with hemostasis. *Circ Res.*  
1050 2002;90:757-763
- 1051 23. Pannell R, Li S, Gurewich V. Highly effective fibrinolysis by a sequential  
1052 synergistic combination of mini-dose tpa plus low-dose mutant prouk. *PLoS One.*  
1053 2015;10:e0122018
- 1054 24. Liu JN, Gurewich V. Fragment e-2 from fibrin substantially enhances pro-  
1055 urokinase-induced glu-plasminogen activation. A kinetic study using the plasmin-resistant  
1056 mutant pro-urokinase ala-158-rpro-uk. *Biochemistry.* 1992;31:6311-6317

- 1057 25. Bamford J, Sandercock P, Dennis M, Burn J, Warlow C. Classification and  
1058 natural history of clinically identifiable subtypes of cerebral infarction. *Lancet*. 1991;337:1521-  
1059 1526
- 1060 26. Nederlandse Vereniging voor Neurologie. Herseninfarct en hersenbloeding.  
1061 2017
- 1062 27. van den Berg SA, Dippel DWJ, Hofmeijer J, Fransen PSS, Caminada K,  
1063 Siegers A, et al. Multicentre randomised trial of acute stroke treatment in the ambulance with  
1064 a nitroglycerin patch (mr asap): Study protocol for a randomised controlled trial. *Trials*.  
1065 2019;20:383
- 1066 28. Koster GT, Nguyen TTM, Groot AED, Coutinho JM, Bosch J, den Hertog  
1067 HM, et al. A reduction in time with electronic monitoring in stroke (artemis): Study protocol for  
1068 a randomised multicentre trial. *BMJ Open*. 2018;8:e020844
- 1069 29. Wahlgren N, Ahmed N, Davalos A, Ford GA, Grond M, Hacke W, et al.  
1070 Thrombolysis with alteplase for acute ischaemic stroke in the safe implementation of  
1071 thrombolysis in stroke-monitoring study (sits-most): An observational study. *Lancet*.  
1072 2007;369:275-282
- 1073 30. Acheampong P, Ford GA. Pharmacokinetics of alteplase in the treatment of  
1074 ischaemic stroke. *Expert Opin Drug Metab Toxicol*. 2012;8:271-281
- 1075 31. Rijken DC. Relationships between structure and function of tissue-type  
1076 plasminogen activator. *Klin Wochenschr*. 1988;66 Suppl 12:33-39
- 1077 32. Chandler WL, Alessi MC, Aillaud MF, Henderson P, Vague P, Juhan-Vague  
1078 I. Clearance of tissue plasminogen activator (tpa) and tpa/plasminogen activator inhibitor  
1079 type 1 (pai-1) complex: Relationship to elevated tpa antigen in patients with high pai-1  
1080 activity levels. *Circulation*. 1997;96:761-768
- 1081 33. del Zoppo GJ, Higashida RT, Furlan AJ, Pessin MS, Rowley HA, Gent M.  
1082 Proact: A phase ii randomized trial of recombinant pro-urokinase by direct arterial delivery in  
1083 acute middle cerebral artery stroke. Proact investigators. Prolyse in acute cerebral  
1084 thromboembolism. *Stroke*. 1998;29:4-11
- 1085 34. Furlan A, Higashida R, Wechsler L, Gent M, Rowley H, Kase C, et al. Intra-  
1086 arterial prourokinase for acute ischemic stroke. The proact ii study: A randomized controlled  
1087 trial. Prolyse in acute cerebral thromboembolism. *JAMA*. 1999;282:2003-2011
- 1088 35. Zarich SW, Kowalchuk GJ, Weaver WD, Loscalzo J, Sassower M, Manzo  
1089 K, et al. Sequential combination thrombolytic therapy for acute myocardial infarction: Results  
1090 of the pro-urokinase and t-pa enhancement of thrombolysis (patent) trial. *J Am Coll Cardiol*.  
1091 1995;26:374-379



- 1092 36. Gusto Angiographic Investigators. The effects of tissue plasminogen  
1093 activator, streptokinase, or both on coronary-artery patency, ventricular function, and survival  
1094 after acute myocardial infarction. *N Engl J Med.* 1993;329:1615-1622
- 1095 37. Kanakakis J, Nanas JN, Tsagalou EP, Maroulidis GD, Drakos SG, Ntalianis  
1096 AS, et al. Multicenter randomized trial of facilitated percutaneous coronary intervention with  
1097 low-dose tenecteplase in patients with acute myocardial infarction: The athens pci trial.  
1098 *Catheter Cardiovasc Interv.* 2009;74:398-405
- 1099 38. Strbian D, Michel P, Seiffge DJ, Saver JL, Numminen H, Meretoja A, et al.  
1100 Symptomatic intracranial hemorrhage after stroke thrombolysis: Comparison of prediction  
1101 scores. *Stroke.* 2014;45:752-758
- 1102 39. Hacke W, Kaste M, Fieschi C, Toni D, Lesaffre E, von Kummer R, et al.  
1103 Intravenous thrombolysis with recombinant tissue plasminogen activator for acute  
1104 hemispheric stroke. The european cooperative acute stroke study (ecass). *JAMA.*  
1105 1995;274:1017-1025
- 1106 40. Multicenter Acute Stroke Trial--Europe Study G, Hommel M, Cornu C,  
1107 Boutitie F, Boissel JP. Thrombolytic therapy with streptokinase in acute ischemic stroke. *N*  
1108 *Engl J Med.* 1996;335:145-150
- 1109 41. Intracerebral hemorrhage after intravenous t-pa therapy for ischemic  
1110 stroke. The ninds t-pa stroke study group. *Stroke.* 1997;28:2109-2118
- 1111 42. Brott T, Adams HP, Olinger CP, Marler JR, Barsan WG, Biller J, et al.  
1112 Measurements of acute cerebral infarction - a clinical examination scale. *Stroke.*  
1113 1989;20:864-870
- 1114 43. van Swieten JC, Koudstaal PJ, Visser MC, Schouten HJ, van Gijn J.  
1115 Interobserver agreement for the assessment of handicap in stroke patients. *Stroke.*  
1116 1988;19:604-607
- 1117 44. Kaatz S, Ahmad D, Spyropoulos AC, Schulman S, Subcommittee on  
1118 Control of A. Definition of clinically relevant non-major bleeding in studies of anticoagulants in  
1119 atrial fibrillation and venous thromboembolic disease in non-surgical patients:  
1120 Communication from the ssc of the isth. *J Thromb Haemost.* 2015;13:2119-2126
- 1121 45. World Medical A. World medical association declaration of helsinki: Ethical  
1122 principles for medical research involving human subjects. *JAMA.* 2013;310:2191-2194  
1123  
1124  
1125

1126 **15. TABLES**

1127

1128 **15.1 Table 1: Classification of intracranial hemorrhage according to location,**  
1129 **severity and causal relation with neurological deterioration**

| <b>NINDS</b>     |                                                                                                                                                                                                                                                                                       |
|------------------|---------------------------------------------------------------------------------------------------------------------------------------------------------------------------------------------------------------------------------------------------------------------------------------|
| <b>sICH</b>      | Any hemorrhage associated with neurological deterioration, not further defined                                                                                                                                                                                                        |
| <b>ECASS I</b>   |                                                                                                                                                                                                                                                                                       |
| <b>HI 1</b>      | Small petechiae along the margins of the infarct                                                                                                                                                                                                                                      |
| <b>HI 2</b>      | Confluent petechiae within the infarcted area, without space-occupying effect                                                                                                                                                                                                         |
| <b>PH 1</b>      | A clot not exceeding 30% of the infarcted area with some mild space-occupying effect                                                                                                                                                                                                  |
| <b>PH 2</b>      | Represented dense blood clot(s) exceeding 30% of the infarct volume with significant space-occupying effect                                                                                                                                                                           |
| <b>sICH</b>      | Not defined                                                                                                                                                                                                                                                                           |
| <b>ECASS II</b>  |                                                                                                                                                                                                                                                                                       |
| <b>HI 1</b>      | Small petechiae along the margins of the infarct                                                                                                                                                                                                                                      |
| <b>HI 2</b>      | Confluent petechiae within the infarcted area, without space-occupying effect                                                                                                                                                                                                         |
| <b>PH 1</b>      | A clot not exceeding 30% of the infarcted area with some mild space-occupying effect                                                                                                                                                                                                  |
| <b>PH 2</b>      | Represented dense blood clot(s) exceeding 30% of the infarct volume with significant space-occupying effect                                                                                                                                                                           |
| <b>sICH</b>      | Neurological deterioration of NIHSS $\geq 4$ + any hemorrhage on CT                                                                                                                                                                                                                   |
| <b>ECASS III</b> |                                                                                                                                                                                                                                                                                       |
| <b>sICH</b>      | Any hemorrhage with neurological deterioration, as indicated by an NIHSS score that was higher by $\geq 4$ points than the value at baseline or the lowest value in the first 7 days or any hemorrhage leading to death. In addition, the hemorrhage must have been identified as the |

|                                                      |                                                                                                                                                                                                                                         |
|------------------------------------------------------|-----------------------------------------------------------------------------------------------------------------------------------------------------------------------------------------------------------------------------------------|
| predominant cause of the neurological deterioration. |                                                                                                                                                                                                                                         |
| <b>SITS-MOST</b>                                     |                                                                                                                                                                                                                                         |
| <b>sICH</b>                                          | Local or remote PH2 on 22– to 36-hour post-treatment imaging, combined with a neurological deterioration of $\geq 4$ points on the NIHSS from baseline, from the lowest NIHSS value between baseline and 24 hours, or leading to death. |
| <b>Heidelberg Bleeding Classification</b>            |                                                                                                                                                                                                                                         |
| <b>1</b>                                             | Hemorrhagic transformation of infarcted brain tissue                                                                                                                                                                                    |
| <b>1a – HI 1</b>                                     | Scattered small petechiae, no mass effect                                                                                                                                                                                               |
| <b>1b – HI 2</b>                                     | Confluent petechiae, no mass effect                                                                                                                                                                                                     |
| <b>1c – PH 1</b>                                     | Hematoma within infarcted tissue, occupying $< 30\%$ , no substantive mass effect                                                                                                                                                       |
| <b>2</b>                                             | Intracerebral hemorrhage within and beyond infarcted brain tissue;                                                                                                                                                                      |
| <b>PH 2</b>                                          | Hematoma occupying 30% or more of the infarcted tissue, with obvious mass effect                                                                                                                                                        |
| <b>3</b>                                             | Intracerebral hemorrhage outside the infarcted brain tissue or intracranial-extracerebral hemorrhage                                                                                                                                    |
| <b>3a</b>                                            | Parenchymal hematoma remote from infarcted brain tissue                                                                                                                                                                                 |
| <b>3b</b>                                            | Intraventricular hemorrhage                                                                                                                                                                                                             |
| <b>3c</b>                                            | Subarachnoid hemorrhage                                                                                                                                                                                                                 |
| <b>3d</b>                                            | Subdural hemorrhage                                                                                                                                                                                                                     |
| <b>sICH</b>                                          | Any intracranial hemorrhage followed by a neurological deterioration that can be attributed to that hemorrhage, defined as an increase of $\geq 4$ points on the NIHSS or $\geq 2$ points on a specific NIHSS item.                     |

1130

1131 *Glossary: HI, hemorrhagic infarction; PH, parenchymatous hematoma; sICH, symptomatic*  
 1132 *intracranial hemorrhage*

1133

1134

1135

1136

1137

**15.2 Table 2: Schedule of al study activities**

|                          | Baseline | < 1 hour | 3 hours | 24 hours | Day 5-7* | Day 30 |
|--------------------------|----------|----------|---------|----------|----------|--------|
| NIHSS                    | X        |          |         | X        | X        |        |
| Laboratory#              | X        | X        | X       | X        |          |        |
| CT/CTA/CTP or<br>MRI/MRA | X        |          |         |          |          |        |
| MRI                      |          |          |         | X        |          |        |
| Modified Rankin<br>Scale |          |          |         |          |          | X      |

1138

1139 *\* or discharge if earlier*1140 *# Extra laboratory tests will not be performed in all centers*1141 *Glossary: CT, computed tomography; CTA, computed tomography angiography; CTP computed*1142 *tomography perfusion; MRI, magnetic resonance imaging; NIHSS, National Institute of Health Stroke*1143 *Scale*

1144

1145 **16. FIGURES**

1146

1147 **16.1 Figure 1. Patient flow in the trial**

1148

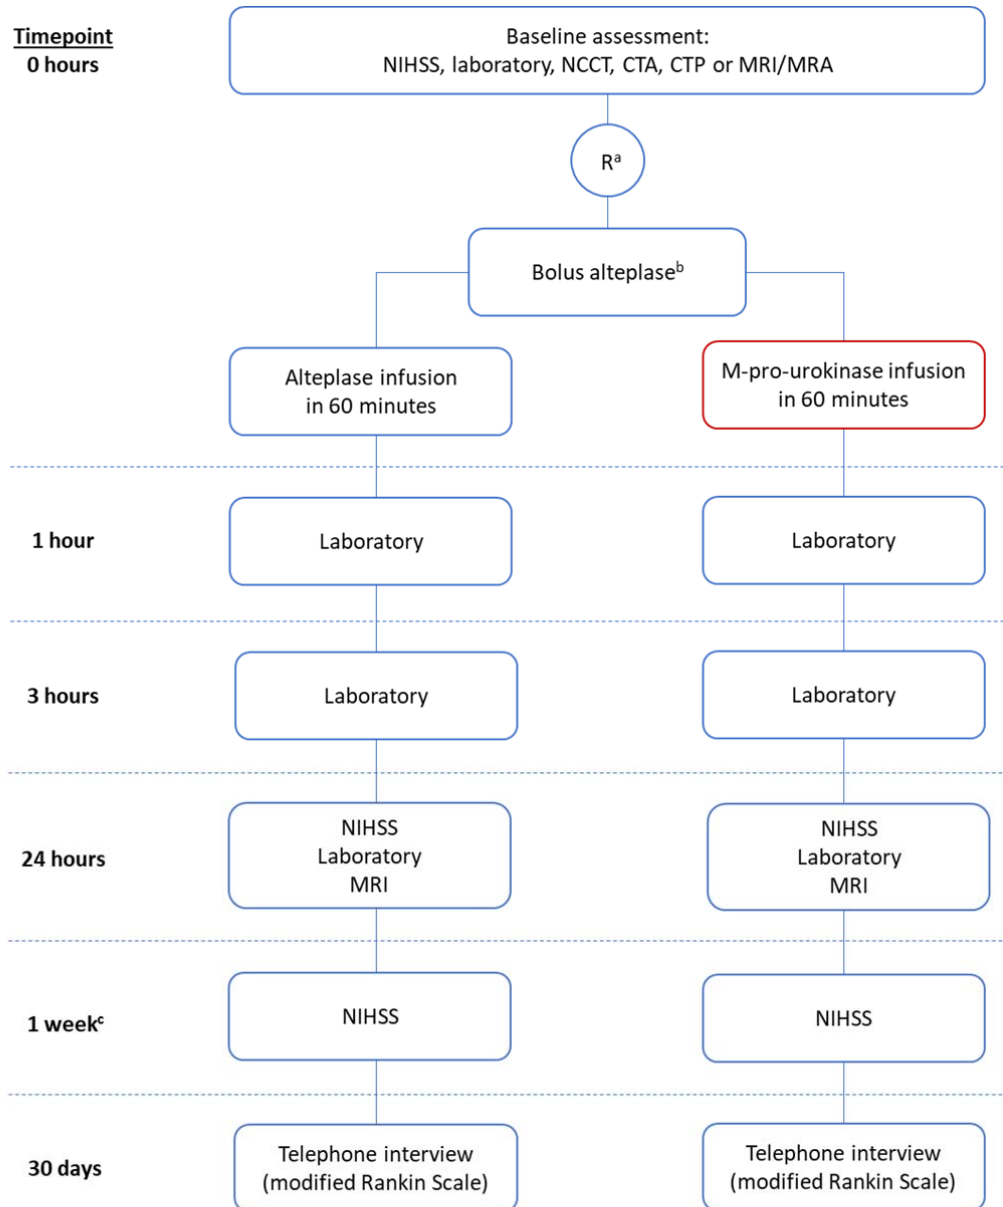

<sup>a</sup> Randomization 1:1. DUMAS uses a deferred consent procedure. Written informed consent will be asked as early as deemed appropriate according to the treating physician. If a patient has died before deferred consent has been obtained, his/her representative will be informed about the study. For these patients, there is no opt-out option since that may bias results.

<sup>b</sup> The control group will receive 10% of the total alteplase dose as a bolus. The intervention group will receive a standard bolus of 5 mg alteplase.

<sup>c</sup> Or discharge, if earlier

Glossary: CTA, Computed tomography angiogram; CTP, Computed tomography perfusion; m-pro-urokinase, Mutant pro-urokinase; MRA, Magnetic Resonance Angiogram; MRI, Magnetic Resonance Imaging; NCCT, Non contrast computed tomography; NIHSS, National Institutes of Health Stroke Scale;

1149

1150

1151 **16.2 Figure 2: selection of patients into simple modified intention-to-treat,**  
1152 **targeted modified intention-to-treat, and targeted modified on-treatment,**  
1153 **as well as per protocol groups.**  
1154

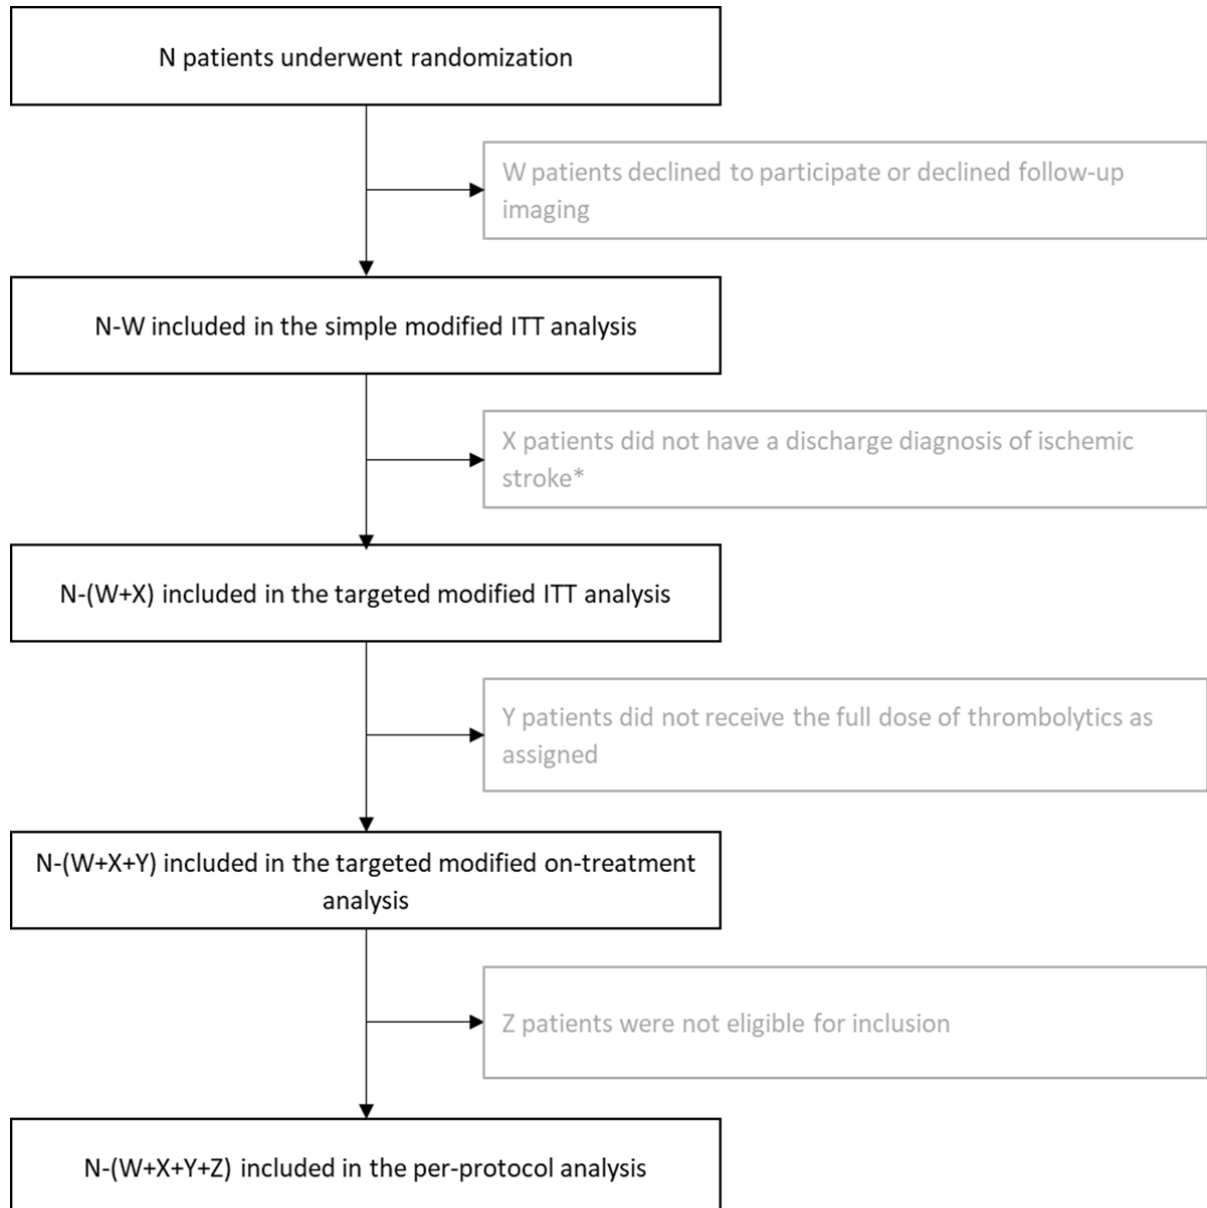

\* Based on discharge diagnosis or as discussed in the Steering committee

1155  
1156

1157 **17. APPENDICES**1158 **17.1 Appendix 1: Distribution of study medication (m-pro-urokinase)**

1159

1160 M-pro-urokinase will be distributed by the hospital pharmacy of Erasmus MC. As long as the  
1161 dose of m-pro-urokinase stays the initial dose of 40mg/hour (means 2 vials per patient),  
1162 Erasmus MC will distribute each hospital with 25 vials (= 1 carton) of m-pro-urokinase at the  
1163 start of the trial. If a center has only 6 vials left, they will notify Erasmus MC and another  
1164 carton with 25 vials will be send. When 150 patients are included, Erasmus MC will only  
1165 distribute an amount of 10 vials each time.

1166 In this trial, a switch to a second therapeutic regimen is possible, which may affect the  
1167 number of vials per patient. When switched to a lower dose, the distribution scheme stays  
1168 the same (still 2 vials per patient needed). When switched to a higher dose (50mg/hour), 3  
1169 vials per patient are required. In this case, Erasmus MC will distribute 30 vials to each center,  
1170 and 12 vials after inclusion of 150 patients. Centers will notify the Erasmus MC when only 9  
1171 vials are left.

1172

1173

1174 **17.2 Appendix 2: Study personnel**

1175

1176 Principal investigators

1177 Diederik Dippel, MD, PhD; neurologist; Erasmus MC Rotterdam

1178 Aad van der Lugt, MD, PhD; neuroradiologist; Erasmus MC Rotterdam

1179

1180 Coordinating investigators

1181 Bob Roozenbeek, MD, PhD; neurologist; Erasmus MC Rotterdam

1182 Nadinda van der Ende, MD; PhD-student; Erasmus MC Rotterdam

1183

1184 Local investigators

1185 Leo Aerden, MD, PhD, Reinier de Graaf, Delft

1186 Ido R van den Wijngaard, Haaglanden MC, The Hague

1187 Heleen den Hertog, Isala, Zwolle

1188



### 1189 **17.3 Appendix 3: Study organization and study committees**

1190

#### 1191 Steering Committee

1192 The Steering Committee, consisting of the Principal Investigator and the Local Principal  
1193 Investigators of each study center, and one independent expert in acute thrombolytic therapy  
1194 for ischemic stroke (professor Gregory del Zoppo, Seattle, University Washington), will be  
1195 responsible for the overall supervision of the trial. Additionally, the steering committee will  
1196 discuss all patients about whom doubt exists concerning the discharge diagnosis of ischemic  
1197 stroke or not (i.e. stroke mimic). Every Steering Committee member can propose cases for  
1198 discussion. The Steering Committee will be chaired by the central PI.

1199

#### 1200 Executive Committee and staff

1201 The Executive committee keeps track of trial progress and makes the strategic decisions on  
1202 a weekly basis. The Executive committee consists of the central PIs (neurologist), a  
1203 neuroradiologist, the study coordinator (postdoc) and an MD/PhD student. The central PI will  
1204 act as overall supervisor. The study coordinator will supervise day to day conduct of the trial.  
1205 An MD (PhD student) will take care of all contacts with participating centers, write reports  
1206 and check incoming data. The Executive committee will report to the Steering committee at  
1207 least on a 3-monthly basis. They will be supported by experienced administrative staff. The  
1208 participating centers will be reimbursed for employment of part-time trial staff.

1209

#### 1210 Writing Committee

1211 The Writing committee consists of the Executive committee and local PIs. The task of the  
1212 Writing committee is to prepare the main publication which will be drafted by the study  
1213 coordinators, supervised by the two central PIs. Typically, the main paper will be authored by  
1214 the study coordinators (first), the local PIs, the committee members, and the central PIs.

1215

#### 1216 Neuroimaging Central Reading Committee

1217 All CT and MRI scans will be assessed by a Neuroimaging Central Reading Committee that  
1218 is blinded to treatment allocation and other clinical information, except expected lesion side.

1219

#### 1220 Data Safety and Monitoring Board

1221 A Data Safety and Monitoring Committee (DSMB), consisting of a neurologist, hematologist  
1222 and neuroradiologist, will advise the chairman of the Steering Committee on the basis of  
1223 unmasked reports about continuation of the trial at intervals proposed above.

1224 Members:

1225 Michael Hill, MD, neurologist, chair of the DSMB

1226 Ann Lowe, MD, hematologist

1227 Jeremy Rempel, MD, neuroradiologist

1228

#### 1229 Independent statistician

1230 Daan Nieboer, PhD (Erasmus MC)

1231

1232 Independent statistician for Bayesian adaptive analysis team

1233 William Meurer MD and Scott Berry, PhD

1234

1235 Advisory Board

1236 The Advisory Board consists of experts in the field of thrombosis, hemostasis and  
1237 thrombolytics. The Advisory Board will provide non-binding strategic advice to one member  
1238 of the Steering Committee (e.g., Prof. dr. Gregory del Zoppo). Members: Dr. Dick Rijken,  
1239 Prof. dr. Victor Gurewich, Prof. dr. Koos Burggraaf, and Prof. dr. Adam Cohen.

1240

1241 Trial statistician and methodologist

1242 Hester Lingsma, PhD (Erasmus MC)

1243

1244

1245

**17.4 Appendix 4: Core data set**

1246

| <b>Inclusion check list</b>                                                                 |  |
|---------------------------------------------------------------------------------------------|--|
| A clinical diagnosis of ischemic stroke                                                     |  |
| A score of at least 1 on the NIH Stroke Scale                                               |  |
| CT ruling out intracranial hemorrhage                                                       |  |
| Treatment possible within 4.5 hours from symptom onset or last seen well                    |  |
| Meet the criteria for standard treatment with IV alteplase according to national guidelines |  |
| Age of 18 years or older                                                                    |  |
| Written informed consent (deferred)                                                         |  |

1247

| <b>Baseline characteristics</b>   |                                                                                                                                                                                                                                                                                                   |
|-----------------------------------|---------------------------------------------------------------------------------------------------------------------------------------------------------------------------------------------------------------------------------------------------------------------------------------------------|
| Demographics                      | Age, sex                                                                                                                                                                                                                                                                                          |
| Clinical                          | NIHSS, pre-stroke mRS, systolic and diastolic blood pressure, Glasgow coma scale, weight, height, body temperature, heart rate                                                                                                                                                                    |
| Medical history and intoxications | Previous stroke, myocardial infarction, hypertension, hypercholesterolemia, peripheral arterial disease, diabetes mellitus, atrial fibrillation, chronic heart failure, intra-cranial hemorrhage, smoking (current or stopped within 6 months), mechanical aortic and/or mitral valve replacement |
| Medication                        | Antiplatelet agents (and if yes, subtypes: acetylsalicylic acid, clopidogrel, dipyridamole, ticagrelor, other), coumarines, direct oral anticoagulants (DOAC), therapeutic heparin(oids), statins, NSAIDs                                                                                         |
| Laboratory                        | When available INR, serum creatinine, GFR (Cockcroft-Gault), serum glucose, C-Reactive Protein, triglycerides, cholesterol status, HbA1c, thrombocyte count, fibrinogen, plasminogen, alpha2-antiplasmin, d-dimer, APTT, DTT, anti-Xa                                                             |

|                |                                                                        |
|----------------|------------------------------------------------------------------------|
| Neuro-imaging* | CT-brain: severity of ischemia with ASPECTS                            |
|                | CT-angiography: status extracranial carotid artery, occlusion location |
|                | CT-perfusion: infarct core, ischemic penumbra                          |

1248

1249

1250

\*Neuro-imaging parameters will be assessed by a central subcommittee

| Intravenous treatment |                                                                                                                                     |
|-----------------------|-------------------------------------------------------------------------------------------------------------------------------------|
| General information   | Date of IVT                                                                                                                         |
| Time registration     | Time of start IVT                                                                                                                   |
| Pre-treatment         | Final systolic and diastolic blood pressure before bolus alteplase                                                                  |
| Blood pressure        | Delay in IVT due to hypertension, medication given to lower blood pressure (if yes, which and how much, if no, why explain why not) |

1251

| Workflow     |                                                                                   |
|--------------|-----------------------------------------------------------------------------------|
| Pre-hospital | Time of symptom onset, if no: time of last seen well and time of symptoms noticed |
| In-hospital  | Time of arrival at hospital, time of NCCT, time of randomization                  |

1252

| Follow-up                       |                                                       |
|---------------------------------|-------------------------------------------------------|
| Laboratory within 1 hour        | Fibrinogen, plasminogen, alpha2-antiplasmine, d-dimer |
| Laboratory at 3 hours           | Fibrinogen, plasminogen, alpha2-antiplasmine, d-dimer |
| Clinical assessment at 24 hours | NIH Stroke Scale                                      |
| Laboratory at 24 hours          | Fibrinogen, plasminogen, alpha2-antiplasmine, d-dimer |
| Neuro-imaging at 24-48          | Infarct size and location, hemorrhagic transformation |

|                                                                              |                                                                                                                                                                                                                                                                                                                                                                                                                                                                                                                                                                                                                                                                                                                                                                                                                                                                                                                                                                                                                                                                                           |
|------------------------------------------------------------------------------|-------------------------------------------------------------------------------------------------------------------------------------------------------------------------------------------------------------------------------------------------------------------------------------------------------------------------------------------------------------------------------------------------------------------------------------------------------------------------------------------------------------------------------------------------------------------------------------------------------------------------------------------------------------------------------------------------------------------------------------------------------------------------------------------------------------------------------------------------------------------------------------------------------------------------------------------------------------------------------------------------------------------------------------------------------------------------------------------|
| hours                                                                        | (Heidelberg Bleeding Classification)                                                                                                                                                                                                                                                                                                                                                                                                                                                                                                                                                                                                                                                                                                                                                                                                                                                                                                                                                                                                                                                      |
| Clinical assessment at 5-7 days or discharge                                 | NIH Stroke Scale                                                                                                                                                                                                                                                                                                                                                                                                                                                                                                                                                                                                                                                                                                                                                                                                                                                                                                                                                                                                                                                                          |
| Clinical assessment at 30 days (-7 days or +14 days) via telephone interview | Modified Rankin Scale score                                                                                                                                                                                                                                                                                                                                                                                                                                                                                                                                                                                                                                                                                                                                                                                                                                                                                                                                                                                                                                                               |
| (Serious) adverse events (at any given time)                                 | <p>Name investigator; date of report; date of (S)AE onset; description of (S)AE;</p> <p>SAE category: an adverse event is considered serious when it: causes mortality, is life-threatening, results in required or prolonged hospitalization, results in risk of persistent or significant disability or incapacity, results in medical or surgical intervention;</p> <p>Most likely cause for (S)AE and other causes:</p> <ol style="list-style-type: none"> <li>1. Stroke progression</li> <li>2. New ischemic stroke</li> <li>3. Intracranial hemorrhage</li> <li>4. Extracranial hemorrhage</li> <li>5. Cardiac ischemia</li> <li>6. Allergic reaction</li> <li>7. Pneumonia</li> <li>8. Other infection and description</li> <li>9. Other cause for (S)AE and description;</li> </ol> <p>Relationship with the study treatment: none, unlikely, possible, probable, definite;</p> <p>Actions regarding the study treatment: none, unlikely, possible, probable, definite;</p> <p>Outcome and date: resolved without sequela(e); resolved with sequela(e) and description, death</p> |

1254

1255 **17.5 Appendix 5: Imaging requirements**

1256

1257 ○ Minimum baseline requirements

1258 WHEN

1259 1. Before randomization a NCCT, CTA and CTP or MRI/MRA should be performed to  
1260 assess eligibility of the study.

1261 HOW

1262 1. Pre-randomization NCCT:

1263 I. The NCCT should contain both thick (5mm) and thin slices (maximum of  
1264 2.5mm).

1265 II. The NCCT should include the whole head.

1266 2. Pre-randomization CTA:

1267 I. The CTA should cover the area from the aortic arch to the vertex.

1268 II. The CTA should include thin slices (maximum of 1.0mm, overlap 50%).

1269 III. The CTA should include the following reconstructions:

1270 1. Axial maximum intensity projection (MIP):

1271 a. MIP slab thickness: 25mm

1272 b. Overlap: 5mm

1273 2. Coronal MIP:

1274 a. MIP slab thickness 25mm

1275 b. Overlap: 5mm

1276 3. Pre-randomization CTP:

1277 I. The CT-perfusion should be focused on the anterior circulation or posterior cir-  
1278 culation depending on the suspected location of the ischemic stroke as deter-  
1279 mined by the neurology assistant or neurologist

1280 4. Pre-randomization MRI/MRA:

1281 I. The study should include the following sequences

1282 1. Axial DWI and ADC maps

1283 2. Axial FLAIR

1284 3. Axial T2\*

1285 4. 3D TOF

1286 5. Contrast Enhanced MRA (CEMRA)

1287 II. The MRI study should cover the whole head (i-iv)

1288 III. The CEMRA study should cover the whole area from the aortic arch to the vertex  
1289 (v)

1290 5. After acquisition:

1291 I. All images (NCCT, CTA and CTP or MRI/MRA) should be saved to the DICOM  
1292 format.

1293 II. All available series should be sent to the core lab for assessment.

1294 ○ Minimum follow-up requirements

1295 WHEN

1296 1. 24 hours after intravenous treatment a MRI/MRA (24-48 h) should be performed to  
1297 assess any intracranial hemorrhage (primary outcome).1298 2. If clinically required (i.e. in case of clinical deterioration of the patient) additional imag-  
1299 ing as needed, at the discretion of the treating physician is acquired.

1300 HOW

1301 1. 24(-48) hours MRI:

1302 I. The MRI study should cover the whole brain.

1303 II. MRI study should include thin slices (maximum of 1.0 mm).

1304 III. The MRI study should include the following sequences:

1305 1. SWI (susceptibility weighted imaging)

1306 2. DWI and ADC maps

1307 3. T2w-TSE (turbo spin echo, also known as fast spin echo (FSE))

1308 4. 3D-T2w-FLAIR

- 1309                           5. DSC-PW MRI (dynamic susceptibility contrast perfusion weighted)  
1310                           6. Optional: 3D-T1w with and without gadolinium  
1311           2. Additional, clinically required imaging:  
1312                I.    At the discretion of the treating physician  
1313  
1314           3. After acquisition:  
1315                I.    All images (MRI, MRA and additional imaging) should be saved to the DICOM  
1316                    format  
1317                II.   All available series should be sent to the core lab for assessment  
1318  
1319



## 1320 17.6 Appendix 6: Adaptive design – Design and Simulation Report

1321

### 1322 17.6.1 Introduction

#### 1323 Background

1324 This document describes the features of the simulated design, including the statistical  
 1325 models, decision rules, and simulation scenarios as input into the FACTS (Fixed and  
 1326 Adaptive Clinical Trial Simulator) software. A small set of operating characteristics for the  
 1327 simulations is also summarized. The goal of this design is to provide a set of prospectively  
 1328 defined, quantitative decision rules to guide interim analyses in the DUMAS trial. In this  
 1329 design, the DUMAS trial can either proceed to the maximum sample size without any  
 1330 changes, or it can transition to a lower or higher dose of the investigational drug at an interim  
 1331 analysis.

1332

#### 1333 Endpoints

1334 The primary endpoint is freedom from any intracranial hemorrhage (NoICH) after stroke  
 1335 thrombolysis (dichotomous) and is measured within 24 (to 48) hours. The secondary  
 1336 endpoint is clinical improvement within 24 hours (Clin), also dichotomous. A positive outcome  
 1337 is indicated by a value of 1, and a negative outcome (presence of ICH or failure to clinically  
 1338 improve) is indicated by a value of 0. Clinical improvement is defined as improvement of at  
 1339 least 4 points on the National Institute of Health Stroke Scale (NIHSS) at 24 hours compared  
 1340 to baseline, or (near) complete recovery (NIHSS 0 or 1).

1341

#### 1342 Treatment Arms

1343 The trial will enroll up to a maximum of 200 subjects with a discharge diagnosis of ischemic  
 1344 stroke, randomized among 2 arms, including a control arm. We have 1 treatment arm which  
 1345 we label generically by their arm index as:  $d = 0$  (control – standard alteplase dosing), 1  
 1346 (treatment – investigational thrombolytic regimen – also known as mutant pro-urokinase  
 1347 (mproUK; HisproUK).

### 1348 17.6.2 Statistical Modeling

1349 This section describes the statistical modeling used in the design. The modeling is Bayesian  
 1350 in nature.

1351

#### 1352 Final Endpoint Model

1353 The following models are fit separately for the primary and secondary endpoint.  
 1354 Let  $Y_i$  be the primary outcome measured at 24 hours for the  $i^{th}$  subject. We model the  
 1355 outcomes as

$$Y_i \sim \text{Bernoulli}(P_{d_i})$$

1356 where  $P_d$  is the underlying response rate for arm  $d$ . We transform the response rates onto  
 1357 the log-odds scale to allow modeling on a continuous scale:

$$\theta_d = \log\left(\frac{P_d}{1 - P_d}\right).$$

1358 The mean response is modeled independently for each dose as:

$$\theta_0 \sim N(0, 2^2),$$

$$\theta_1 \sim N(0, 2^2).$$

1359 Thus,  $\theta_d$  for each dose is estimated separately using only data from that dose.

1360

### 1361 Evaluation of Posterior Estimates

1362 Posterior estimates are independently calculated for each endpoint.

1363

1364 The Bayesian final endpoint model is fitted to the data at each update. The posterior is  
1365 calculated as:

$$p(\omega|Y) \propto \prod_{i=1}^n p(y_i|\varphi)p(\varphi)$$

1366 where  $\varphi$  is the set of parameters for the final endpoint model,  $p(\varphi)$  is the prior for those  
1367 parameters,  $y_i$  is the final response for each subject, and  $n$  is the number of subjects. The  
1368 posterior is evaluated using MCMC with individual parameters updated by Metropolis  
1369 Hastings (or Gibbs sampling where possible), using only the  $y_i$  data available at the time of  
1370 the update.

1371

### 1372 Quantities of Interest

1373 We define a number of quantities that will be tracked and may be used to make decisions  
1374 during the trial.

1375

#### 1376 *Posterior Probabilities*

1377 For each dose, we calculate the following quantities from the posterior:

1378

- 1379 • For the primary endpoint (NoICH), the probability that the mean response on dose  $d$   
1380 is greater than on control by at least 0.05:

$$Pr(\theta_d - \theta_0 > 0.05)$$

1381

- 1382 • For the secondary endpoint (Clin), the probability that the mean response on dose  $d$   
1383 is greater than on control by at least 0.1:

$$Pr(\theta_d - \theta_0 > 0.1)$$

1384

#### 1385 *Decision Quantities*

1386 Throughout the trial, decisions may be based on the following quantities:

1387

- 1388 • NoICH endpoint  $Pr(\theta_d - \theta_0 > 0.05)$  for  $dose = mproUK$
- 1389 • Clin endpoint:  $Pr(\theta_d - \theta_0 > 0.1)$  for  $dose = mproUK$

1390

### 1391 Conventions for Missing Data

1392 At any analysis, some subjects may have missing data for the final endpoint. The missing  
1393 data could result from the subject dropping out of the study, or because the subject simply  
1394 has not yet reached the final visit.

1395

1396 If the subject has not yet reached the final visit, the endpoint value is imputed from the  
1397 estimate of the response for the subjects treatment arm (effectively contributing no  
1398 information to the update of that estimate).

1399

1400 For any subject whose final endpoint is unknown due to drop out, the final outcome will be  
1401 multiply imputed from the Bayesian model.

### 1402 **17.6.3 Study Design**

#### 1403 Timing of Interim Analyses for dose adaptation

1404 The first interim will occur after 60 subjects with a discharge diagnosis of ischemic stroke  
1405 have data up to 48 hours. Subsequent interims will be conducted after inclusion of every 20  
1406 patients with a discharge diagnosis of ischemic stroke and will continue until full accrual.  
1407 Since interims are defined by calendar time, the total number of planned interims,  $I$ , is  
1408 random and will depend on the rate at which subjects accrue to the trial. Note that in the  
1409 initial phase of the trial, mixed quantitative-qualitative review for safety will be carried out by  
1410 the DSMB, after inclusion of every 10 patients.

1411

#### 1412 Allocation

1413 The trial will enroll 200 subjects with a discharge diagnosis of ischemic stroke that will be  
1414 randomized to the treatment arms in a fixed ratio. Randomization will occur in blocks of  
1415 variable sizes.

1416

#### 1417 Criteria for Changing Dose

##### 1418 *Changing to a lower dose*

1419 For interim 1- $I$ , the trial may transition to a lower dose if BOTH of the following criteria are  
1420 satisfied:

- 1421 • *NoICH endpoint*:  $\Pr(\theta_d - \theta_0 > 0.05) < 0.5$  for  $d = \text{mproUK}$
- 1422 • *Clin endpoint*:  $\Pr(\theta_d - \theta_0 > 0.1) > 0.5$  for  $d = \text{mproUK}$

1423

##### 1424 *Changing to a higher dose*

1425 For interim 1- $I$ , the trial may transition to a higher dose if all of the following criteria are sat-  
1426 isfied:

- 1427 • *NoICH endpoint*  $\Pr(\theta_d - \theta_0 > 0.05) > 0.5$  for  $d = \text{mproUK}$
- 1428 • *Clin endpoint*  $\Pr(\theta_d - \theta_0 > 0.1) < 0.5$  for  $d = \text{mproUK}$

1429

1430 Note that, as per protocol, the results of the interim analysis will be presented to the DSMB,  
1431 who will advise the chair of the Steering Committee.

1432

#### 1433 Final Evaluation Criteria

1434 At the final analysis, the trial will be considered successful based on the primary endpoint  
1435 analysis defined in the statistical analysis plan and in the main clinical protocol.

### 1436 **17.6.4 Simulation Scenarios**

1437 We evaluate the proposed design through trial simulation. We hypothesize several possible  
1438 underlying truths for the mean response, as well as for trial execution variables such as  
1439 accrual and dropout. For each of these scenarios, we generate data according to those  
1440 truths and run through the design as specified above. We repeat this process to create  
1441 multiple “virtual trials” and we track the behavior of each trial. In this section, we describe the  
1442 parameters used to generate the virtual subject-level data. Simulations provided below

1443 provide what happens until either the trial reaches the maximum sample size without  
 1444 triggering a dose adjustment OR whether a dose change rule is triggered. For example, if a  
 1445 dose increase is recommended at 120 patients, the last 80 patients would be randomized 1:1  
 1446 to the new dose versus control.

1447

1448 Virtual Subject Response Profiles

1449 We consider 7 profiles for which subject outcomes for the final endpoints are simulated to  
 1450 have response rates as shown in Table 1.

1451 *Table 1: Virtual subject response rates*

1452

| Scenario               | NoICH   |        | Clin    |        |
|------------------------|---------|--------|---------|--------|
|                        | Control | mproUK | Control | mproUK |
| BetterBetter           | 0.8     | 0.93   | 0.4     | 0.6    |
| ICHbetterClinNull      | 0.8     | 0.93   | 0.4     | 0.4    |
| ICHNullClinBetter      | 0.8     | 0.93   | 0.4     | 0.6    |
| NullNull               | 0.8     | 0.8    | 0.4     | 0.4    |
| ICH5betterClinNull     | 0.8     | 0.85   | 0.4     | 0.4    |
| ICHnullClin10better    | 0.8     | 0.8    | 0.4     | 0.5    |
| ICH5betterClin10better | 0.8     | 0.85   | 0.4     | 0.5    |

1453 Accrual Profiles

1454 We assume two patients per week for just under 2 years. We simulate the random arrival of  
 1455 subjects into the trial from a Poisson process with the mean weekly rates specified in Table  
 1456 2. Within each accrual profile, there may be differential recruitment rates over time and  
 1457 across regions. Currently, we simulated only one region for recruitment. Thus, for each  
 1458 region, we specify:

1459

- 1460 • the mean number of subjects per week at peak accrual,
- 1461
- 1462 • the start date (in weeks from the start of the trial),
- 1463
- 1464 • whether the region will have a ramp up phase, and if so, when the ramp up will be  
 1465 complete, and
- 1466
- 1467 • whether the region will have a ramp down phase, and if so, when the ramp down will  
 1468 begin and when it will be complete. Ramp up and ramp down define simple linear  
 1469 increases and decreases in the mean recruitment rate from the start to the end of the  
 1470 ramp. Thus some simulated trials recruit more quickly than this and some more  
 1471 slowly.

1472 *Table 2: Accrual Profiles*

| Profile Name | Region Index | Peak Rate | Start Week | Ramp Up | Ramp up Complete | Ramp Down | Start Ramp Down | Ramp Down Complete |
|--------------|--------------|-----------|------------|---------|------------------|-----------|-----------------|--------------------|
| Acc 1        | 1            | 2         | 0          | NA      | NA               | NA        | NA              | NA                 |

1473

1474 Dropout Profiles

1475 We assume no dropouts for the purpose of this simulation.

### 1476 **17.6.5 Operating Characteristics**

1477 For the scenarios described above, we simulate multiple virtual trials and track the behavior  
 1478 of each trial, including the preliminary or final outcome of the trial, the estimated mean  
 1479 response, etc. In this study, the trial will continue with a new dose replacing the initial dose in  
 1480 the event a decision rule is triggered. The results in this section are summarized across all  
 1481 simulated trials for each scenario.

1482

#### 1483 Overall

1484 This section gives a high-level description of the operating characteristics. Table 3 shows the  
 1485 following information per scenario:

1486

1487 • N sim: the number of simulated trials

1488

1489 • E[N]: the expected sample size at the time a dose adaptation is recommended

1490

1491 • Pr(max): the proportion of trials that enroll fully without any interim analysis recommending  
 1492 a dose change

1493

1494 • E[duration]: the expected time until the first dose adaptation trial in weeks.

1495

1496 *Table 3: Operating Characteristics Up To First Dose Adaptation*

| Accrual | Dropout | VSR                    | N sim | E[N] | Pr(Max) | E[duration] |
|---------|---------|------------------------|-------|------|---------|-------------|
| Acc1    | Drop1   | BetterBetter           | 10000 | 125  | 0.42    | 63          |
| Acc1    | Drop1   | ICHbetterClinNull      | 10000 | 68   | 0.02    | 35          |
| Acc1    | Drop1   | ICHNullClinBetter      | 10000 | 73   | 0.04    | 36          |
| Acc1    | Drop1   | NullNull               | 10000 | 75   | 0.07    | 38          |
| Acc1    | Drop1   | ICH5betterClinNull     | 10000 | 71   | 0.03    | 36          |
| Acc1    | Drop1   | ICHnullClin10better    | 10000 | 68   | 0.02    | 34          |
| Acc1    | Drop1   | ICH5betterClin10better | 10000 | 74   | 0.05    | 37          |

1497

1498

1499

#### 1500 Trial Outcomes

1501 This section summarizes the outcomes of the simulated trials. For each scenario in Table 4,  
 1502 the columns represent the proportion of simulated trials meeting each of the following  
 1503 definitions:

1504

1505 • Early Dose Increase (EDI): recommended increase in dose at interim analysis

1506

1507 • Early Dose Decrease (EDD): recommended decrease in dose at interim analysis

1508  
1509  
1510

*Table 4: Trial Outcomes Up To First Dose Adaptation*

| Accrual | Dropout | VSR                    | EDI  | EDD  |
|---------|---------|------------------------|------|------|
| Acc1    | Drop1   | BetterBetter           | 0.30 | 0.28 |
| Acc1    | Drop1   | ICHbetterClinNull      | 0.82 | 0.16 |
| Acc1    | Drop1   | ICHNullClinBetter      | 0.09 | 0.86 |
| Acc1    | Drop1   | NullNull               | 0.32 | 0.60 |
| Acc1    | Drop1   | ICH5betterClinNull     | 0.51 | 0.45 |
| Acc1    | Drop1   | ICHnullClin10better    | 0.21 | 0.76 |
| Acc1    | Drop1   | ICH5betterClin10better | 0.35 | 0.59 |

1511

1512

### **17.6.6 Computational Details**

1513 This report reflects the design parameters contained within the TSIdualendpointDec3.facts  
1514 file. The simulations were run using FACTS (Berry Consultants, LLC, Austin, TX) version  
1515 6.2.4. The R software package was used to summarize the simulation output and to create  
1516 tables for this report.

1517

1518

1519

1520

1521

1522

1523

1524

1525

1526



# 1 DUMAS - Statistical Analysis Plan

2 Nadinda van der Ende, Bob Roozenbeek, Aad van der Lugt, Diederik Dippel, on behalf of the  
3 DUMAS investigators.

4 V1.1 27-06-2022

5

## 6 Introduction

7 This document summarizes the statistical analysis of the DUMAS (DUal thrombolytic therapy  
8 with Mutant pro-urokinase and low dose Alteplase for ischemic Stroke) trial. We will describe  
9 how missing data will be handled, the methodology to assure adequate blinding, and the  
10 statistical procedures to estimate the effect of this dual thrombolytic treatment. Additionally, we  
11 predefine the most important subgroup analyses. Please note that it is possible that not all pre-  
12 specified analyses listed in this statistical analysis plan will be included in the publication on the  
13 main outcomes of the trial, due to word count restrictions. Those analyses will be made available  
14 in subsequent publications or online. This document should be read as an adjunct to the study  
15 protocol, which can be found on the DUMAS website ([https://dumas-trial.nl/trial-protocols-and-](https://dumas-trial.nl/trial-protocols-and-documents.html)  
16 [documents.html](https://dumas-trial.nl/trial-protocols-and-documents.html)).

17

## 18 Aim of DUMAS

19 The aim of DUMAS is to assess the safety and efficacy of dual thrombolytic treatment consisting  
20 of a small bolus of alteplase followed by mutant pro-urokinase (m-proUK) against usual  
21 treatment with alteplase in patients presenting with ischemic stroke.

22

## 23 Trial design

24 DUMAS (NCT04256473) is a multicenter, phase II trial with prospective randomized open-label  
25 blinded end-point (PROBE) design, and adaptive design for dose optimization. Patients are  
26 randomly assigned (1:1) to receive a bolus of IV alteplase (5mg) followed by continuous IV  
27 infusion of m-proUK (40mg/hr during 60 minutes) or usual care with alteplase (0.9mg/kg).

28 During the study, the m-pro-urokinase dosage may be revised, randomization will remain the  
29 same. The randomization procedure will be computer- and web-based, using permuted blocks.  
30 Block size will not be revealed to investigators and study personnel. Back-up by telephone will  
31 be provided. Randomization will be stratified for center.

32

## 33 Study population

34 The study population will be drawn from patients with a clinical diagnosis of ischemic stroke at  
35 the Emergency Department of several large university and general hospitals. Patients meeting the  
36 inclusion and exclusion criteria as set below will be entered in the trial.

37

## 38 Inclusion criteria

39 In order to be eligible to participate in this study, a subject must meet all of the following  
40 criteria:

- 41 - A clinical diagnosis of ischemic stroke;
- 42 - A score of at least 1 on the NIH Stroke Scale;
- 43 - CT or MRI ruling out intracranial hemorrhage;
- 44 - Treatment is possible
- 45 ○ within 4.5 hours from symptom onset or last seen well, or

- 46 ○ between 4.5 to 12 hours from symptom onset or last seen well, and
- 47     ▪ the infarct core is less than 25 mL **and** a penumbra is at least the same size
- 48     as the infarct core (i.e. total ischemic volume/infarct core mismatch  $\geq$
- 49     2.0),<sup>1</sup>
- 50     ▪ or in case of lacunar syndrome,<sup>2</sup> if there is a diffusion-weighted imaging
- 51     and FLAIR mismatch<sup>3</sup>;
- 52 - The criteria for standard treatment with IV alteplase according to national guidelines<sup>4</sup> are
- 53 met;
- 54 - Patient age is 18 years or older;
- 55 - Patient or legal representative has provided written informed consent (deferred).

56

#### 57 Exclusion criteria

58 A potential subject who meets any of the following criteria will be excluded from participation in  
59 this study:

- 60 - The subject is eligible for endovascular thrombectomy (i.e. has a proximal intracranial
- 61 large artery occlusion on CTA or MRA);
- 62 - Contra-indication for treatment with IV alteplase according to national guidelines<sup>4</sup>:
  - 63 ○ Arterial blood pressure exceeding 185/110 mmHg and not responding to
  - 64 treatment
  - 65 ○ Blood glucose less than 2.7 or over 22.2 mmol/L
  - 66 ○ Cerebral infarction in the previous 6 weeks with residual neurological deficit or
  - 67 signs of recent infarction on neuro-imaging
  - 68 ○ Head trauma in the previous 4 weeks

- 69           ○ Major surgery or serious trauma in the previous 2 weeks
- 70           ○ Gastrointestinal or urinary tract hemorrhage in the previous 2 weeks
- 71           ○ Previous intracerebral hemorrhage
- 72           ○ Use of anticoagulant with INR exceeding 1.7 or APTT exceeding 50 seconds
- 73           ○ Known thrombocyte count less than  $90 \times 10^9/L$ . When the treating physician
- 74           suspects a thrombocyte count below  $90 \times 10^9/L$  (e.g. suspected hemorrhagic
- 75           diathesis), the thrombocyte count in the laboratory should be awaited prior to
- 76           inclusion in DUMAS.
- 77           ○ Treatment with direct thrombin or factor X inhibitors, unless specific antidotum
- 78           has been given, i.e. idarucizumab in case of dabigatran use.
- 79       - Pre-stroke disability which interferes with the assessment of functional outcome at 30
- 80       days, i.e. mRS > 2;
- 81       - Known pregnancy or if pregnancy cannot be excluded, i.e., adequate use of any
- 82       contraceptive method (e.g. intrauterine devices) or sterilization of the subject herself.
- 83       - Contra-indication for an MRI scan, i.e.:
- 84           ○ an MRI incompatible pacemaker, ICD, pacing wires and loop records
- 85           ○ metallic foreign bodies (e.g. intra-ocular)
- 86           ○ prosthetic heart valves
- 87           ○ blood vessel clips, coils or stents not confirmed to be MRI compatible
- 88           ○ an implanted electronic and/or magnetic implant or pump (e.g. neurostimulator)
- 89           ○ cochlear implants
- 90           ○ mechanical implants (implanted less than 6 weeks ago)
- 91           ○ a copper intrauterine device

92 - Participation in any medical or surgical therapeutic trial other than DUMAS (or MR  
93 ASAP<sup>5</sup>/ARTEMIS.<sup>6</sup>

94

#### 95 Sample size

96 We will include 200 patients with a final diagnosis of ischemic stroke randomized 1:1 to either  
97 standard thrombolytic treatment or dual thrombolytic treatment. We assume that the primary  
98 outcome, any ICH, will occur with a probability of 20%<sup>7</sup> with standard thrombolytic treatment  
99 and a probability of 7% in the patients treated with dual thrombolytic therapy, for an overall  
100 effect (OR) of 0.3. This sample size will provide us with a power of at least 77% to detect a  
101 statistically significant effect on the primary outcome. This estimate does not take into account  
102 the use of multivariable adjustment for differences in baseline characteristics in the primary  
103 analysis, which will increase the power by 10-25%. To compensate for inclusion of patients with  
104 a final diagnosis other than ischemic stroke (e.g. stroke mimic) and patients who did not receive  
105 the full dose of thrombolytics as assigned, we will include additional patients on a 1 to 1 basis.  
106 This implies that we expect that the intention to treat population will be larger than 200 patients.  
107 We estimate that 20% of the included patients will not have a final diagnosis of ischemic stroke.

108

109

110 *Figure 1: selection of patients into the simple modified intention-to-treat, targeted modified*  
111 *intention-to-treat, and targeted modified on-treatment groups, as well as per protocol groups.*

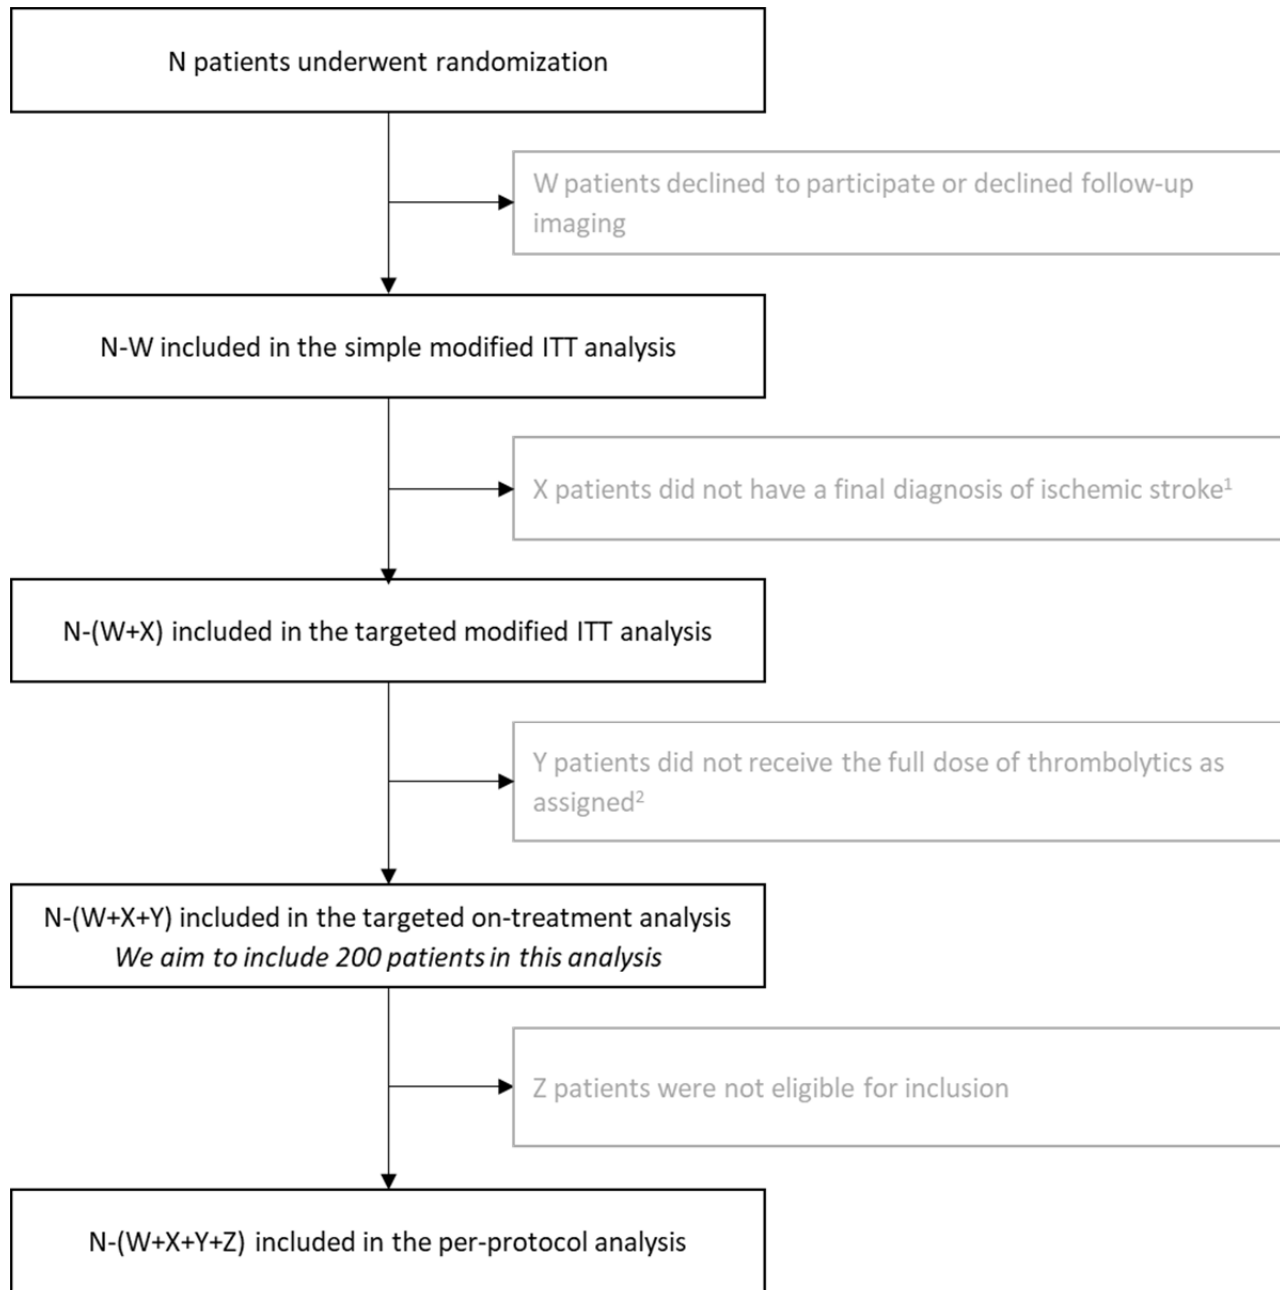

<sup>1</sup> Based on discharge diagnosis or as discussed in the Steering committee

<sup>2</sup> Patients who did not receive the full dose of thrombolytics due to hemorrhage will not be excluded

112

113

114

## 115 Study treatment

116 The intervention arm will receive a bolus of IV alteplase 5 mg, which will be followed by a  
117 continuous infusion of m-proUK, either 40 mg in 60 minutes (initial dose) or an alternate dose.

118 Depending on the result of interim analyses, the m-proUK dosage may be revised to:

- 119 - Higher than the initial dose, by 25% (i.e. 50 mg in 60 minutes)
- 120 - Lower than the initial dose, by 25% (i.e. 30mg in 60 minutes)

121 A detailed description of this adaptive design for dose optimization can be found in Appendix 6  
122 of the DUMAS research protocol on the website ([https://dumas-trial.nl/trial-protocols-and-](https://dumas-trial.nl/trial-protocols-and-documents.html)  
123 [documents.html](https://dumas-trial.nl/trial-protocols-and-documents.html)).

124 The control arm will receive standard treatment with IV alteplase alone in a dose of 0.9  
125 mg/kg (10% bolus + 90% infusion in 60 minutes), maximum dose 90 mg.

126

## 127 Outcomes

### 128 Primary outcome

129 The primary outcome is any post-intervention intracerebral hemorrhage/hematoma confirmed by  
130 neuroimaging according to the Heidelberg Bleeding Classification at 24 hours (range: 12 to 48  
131 hours) of study drug administration preferably by MRI (SWI).<sup>8</sup>

132

### 133 Secondary outcome

#### 134 *Secondary clinical outcomes*

- 135 - Score on the National Institute of Health Stroke Scale (NIHSS) assessed at 24 hours (range: 12 to  
136 48 hours) and at 5-7 days post-treatment, or discharge if earlier.<sup>9</sup>

- 137 - Improvement of at least 4 points on NIHSS at 24 hours (range: 12 to 48 hours) compared to  
138 baseline, or (near) complete recovery (NIHSS 0 or 1).  
139 - Score on the modified Rankin Scale (mRS) assessed at 30 days (-7 days or +14 days) post-  
140 treatment.<sup>10</sup>  
141 - All possible dichotomizations of the mRS as assessed at 30 days (-7 or +14 days) post-  
142 treatment. This includes complete recovery (mRS 0 vs 1-6), excellent functional outcome  
143 (mRS 0-1 vs 2-6), good functional outcome (mRS 0-3 vs 4-6), and handicapped survival  
144 (mRS 0-4 vs 5-6) and survival in any condition (mRS 0-5 vs 6).

145 *Secondary neuroimaging outcomes*

- 146 - Infarct volume measured with MRI (DWI) at 24 hours (range: 12 to 48 hours) post-treatment.  
147 - Change (pre-treatment vs. post-treatment) in abnormal perfusion volume based on TTP/MTT  
148 maps measured with CT perfusion at baseline and MRI at 24 hours (range 12 to -48 hours) post  
149 treatment.

150 *Secondary blood biomarker outcomes*

- 151 - Secondary blood biomarkers of thrombolysis within 1 hour post-treatment, after 3 hours and after  
152 24 hours post-treatment, including d-dimers and fibrinogen.  
153 - Change in blood biomarkers of thrombolysis from baseline to 24 hours, including d-dimers and  
154 fibrinogen.

155 *Safety outcomes*

- 156 - Symptomatic intracranial hemorrhage (sICH) according to the Heidelberg Bleeding Classification  
157 within the follow-up period defined by the last follow-up contact at 30 days.<sup>8</sup>  
158 - Death from any cause including intracranial hemorrhage within the follow-up period defined by  
159 the last follow-up contact at 30 days (-7 days or +14 days) (this is equivalent to handicapped  
160 survival (mRS 0-4 vs 5-6) and survival in any condition (mRS 0-5 vs 6).



161 - Major extracranial hemorrhage according to the ISTH criteria within 24 hours of study drug  
162 administration.<sup>11</sup>

163

## 164 Blinding

165 DUMAS has a PROBE design, which means both patient and treating physician will be aware of  
166 the treatment assignment. All imaging will be assessed in a blinded manner by an independent  
167 imaging committee. Members of the imaging committee will be blinded to all clinical  
168 information, except for clinical symptoms at baseline. Clinical symptoms will be defined as side  
169 of hemiparesis, presence of aphasia, or non-localizing symptoms for patients without  
170 hemiparesis or aphasia. Assessment of the mRS at 30 days will be assessed in a telephone  
171 interview through standardized forms and procedures from a central location, by a trained  
172 investigator unaware of treatment allocation. Information on treatment allocation will be kept  
173 separate from the outcome database. The steering committee will be kept unaware of the results  
174 of interim analyses of efficacy and safety. The independent trial statistician will combine clinical  
175 data with the outcome data in order to report to the data safety monitoring board (DSMB).

176

## 177 Missing data and death

178 Baseline data by treatment allocation will be reported with standard statistical procedures.  
179 Missing values will be reported. For descriptive analyses, only the crude, non-imputed data will  
180 be presented. For the regression analyses, missing values, except the primary outcome, will be  
181 imputed using multiple imputation (n=5). For patients who died within the study period we will  
182 assign the worst score for all unassessed clinical outcome measures and use those for analyses.

183

184 [Statistical analysis](#)

185 We will perform and report 4 analyses, of which the first is the primary:

- 186 1. Simple modified intention-to-treat analysis to assess overall safety and efficacy. This is a  
187 modified intention-to-treat analysis because we exclude patients who did not give consent  
188 to participate in the study. We will additionally report safety parameters based on the full  
189 cohort, including patients who did not give consent.
- 190 2. Targeted modified intention-to-treat analysis excluding patients with a final diagnosis  
191 other than ischemic stroke to assess safety and efficacy in the target population.
- 192 3. Targeted modified on-treatment analysis to assess the safety and efficacy in patients who  
193 actually received the treatment excluding patients with a final diagnosis other than  
194 ischemic stroke.
- 195 4. Per-protocol analysis.

196 See also Figure 1 for selection of patients into simple modified intention-to-treat, targeted  
197 modified intention-to-treat, and targeted modified on-treatment groups, as well as per protocol  
198 groups.

199

200 [Primary effect analysis](#)

201 The effect of the study treatment on the primary outcome will be assessed with multivariable  
202 logistic regression modeling with study treatment as a binary independent variable (m-pro-  
203 urokinase vs. control). The effect parameter is an odds ratio (OR) with 95% confidence interval  
204 (CI). This effect estimate will be adjusted for important prognostic factors at baseline, which  
205 include at least age and time from onset of symptoms to randomization. Stroke severity (NIHSS),  
206 lacunar syndrome (yes/no),<sup>2</sup> systolic blood pressure, pre-study antiplatelet treatment and

207 endovascular treatment (yes/no) will be considered additionally in this order. Whether the dosing  
208 (initial vs. modified) of the study treatment modifies the treatment effect, will be analyzed with a  
209 multiplicative interaction parameter in the main analysis. Adjusted and unadjusted effect  
210 estimates with corresponding 95% confidence intervals will be reported.

211

#### 212 Secondary, tertiary and safety analyses

213 The effect of the study treatment on the secondary outcomes will be assessed with multivariable  
214 linear, logistic or ordinal regression modeling with study treatment as a binary independent  
215 variable (either dose of m-pro-urokinase vs. control). The reported effect parameter will be either  
216 a beta, an OR, or a common OR with 95% CI. Adjusted and unadjusted effect estimates with  
217 corresponding 95% CIs will be reported. These effects will be adjusted with variables that are  
218 predictive of the specific outcome measure. For the NIHSS outcome measures, we will adjust  
219 for baseline NIHSS in all models.

220

#### 221 Subgroup analyses

222 The effect of intervention in subgroups will be analyzed on any ICH (i.e., primary outcome) and  
223 the NIHSS (i.e., efficacy outcome). We will perform subgroup analyses on categorized baseline  
224 variables, including age, sex, systolic blood pressure, ASPECTS, time from onset to study  
225 treatment, NIHSS score, extracranial carotid or vertebral arterial occlusion, pre-study antiplatelet  
226 treatment, DWI lesion (yes/no), and lacunar syndrome (yes/no). In case of a change in the dose  
227 of m-proUK, we will also perform subgroup analysis in patients with the initial dose and patients  
228 with the alternate dose. Subgroup analyses will be done by testing for interaction of the subgroup  
229 indicator with treatment.

230

### 231 Time path of the analysis and locking of the database

232 After the follow-up of the final patient, the last records of the database will be cleaned and  
233 checked for completeness within one month. Data will be checked by the research coordinator  
234 and by an independent monitor according to the monitoring plan. Upon completion, the database  
235 will be locked, ultimately 3 months after the last patient has been included.

236 . The final analysis will be done by the two study coordinators, and reported to the independent  
237 statistician who will do a third check for consistency and adherence to the SAP. The final results  
238 will then be shared for consideration with the Trial Steering Committee. Within 4 months after  
239 obtaining the final results, a manuscript describing the main results of the trial will be submitted  
240 for publication. The syntax and output will be made available upon request.

241

### 242 Status of the trial

243 As of this writing, a total of 4 centers have been initiated in the Netherlands, and a total of 195  
244 patients have been included in DUMAS. No dose adaptations have occurred as advised by the  
245 DSMB until now.

### 246 References

- 247 1. Ma H, Campbell BCV, Parsons MW, Churilov L, Levi CR, Hsu C, et al. Thrombolysis guided by  
248 perfusion imaging up to 9 hours after onset of stroke. *N Engl J Med*. 2019;380:1795-1803  
249 2. Bamford J, Sandercock P, Dennis M, Burn J, Warlow C. Classification and natural history of  
250 clinically identifiable subtypes of cerebral infarction. *Lancet*. 1991;337:1521-1526  
251 3. Thomalla G, Simonsen CZ, Boutitie F, Andersen G, Berthezene Y, Cheng B, et al. Mri-guided  
252 thrombolysis for stroke with unknown time of onset. *N Engl J Med*. 2018;379:611-622  
253 4. Nederlandse Vereniging voor Neurologie. Herseninfarct en hersenbloeding. 2017  
254 5. van den Berg SA, Dippel DWJ, Hofmeijer J, Fransen PSS, Caminada K, Siegers A, et al.  
255 Multicentre randomised trial of acute stroke treatment in the ambulance with a nitroglycerin  
256 patch (mr asap): Study protocol for a randomised controlled trial. *Trials*. 2019;20:383

- 257 6. Koster GT, Nguyen TTM, Groot AED, Coutinho JM, Bosch J, den Hertog HM, et al. A reduction  
258 in time with electronic monitoring in stroke (artemis): Study protocol for a randomised  
259 multicentre trial. *BMJ Open*. 2018;8:e020844
- 260 7. Wahlgren N, Ahmed N, Davalos A, Ford GA, Grond M, Hacke W, et al. Thrombolysis with  
261 alteplase for acute ischaemic stroke in the safe implementation of thrombolysis in stroke-  
262 monitoring study (sits-most): An observational study. *Lancet*. 2007;369:275-282
- 263 8. von Kummer R, Broderick JP, Campbell BC, Demchuk A, Goyal M, Hill MD, et al. The  
264 heidelberg bleeding classification: Classification of bleeding events after ischemic stroke and  
265 reperfusion therapy. *Stroke*. 2015;46:2981-2986
- 266 9. Brott T, Adams HP, Olinger CP, Marler JR, Barsan WG, Biller J, et al. Measurements of acute  
267 cerebral infarction - a clinical examination scale. *Stroke*. 1989;20:864-870
- 268 10. van Swieten JC, Koudstaal PJ, Visser MC, Schouten HJ, van Gijn J. Interobserver agreement  
269 for the assessment of handicap in stroke patients. *Stroke*. 1988;19:604-607
- 270 11. Kaatz S, Ahmad D, Spyropoulos AC, Schulman S, Subcommittee on Control of A. Definition of  
271 clinically relevant non-major bleeding in studies of anticoagulants in atrial fibrillation and  
272 venous thromboembolic disease in non-surgical patients: Communication from the ssc of the  
273 isth. *J Thromb Haemost*. 2015;13:2119-2126  
274
