# Supplementary material
Source: PubMed Central journal article supplement (PMC10203964)
Supplement: jamaneurol-e231262-s003.pdf [file jamaneurol-e231262-s003.pdf]

\*First name, last name, and suffix (if applicable) are required and will appear in PubMed.

| <b>*Group Name(s): DUMAS Investigators</b> |                     |                              |                  |                                      |                                          |                                                         |                                                                                            |
|--------------------------------------------|---------------------|------------------------------|------------------|--------------------------------------|------------------------------------------|---------------------------------------------------------|--------------------------------------------------------------------------------------------|
| <b>*First Name and Middle Initial(s)</b>   | <b>*Last Name</b>   | <b>*Suffix (eg, Jr, III)</b> | Academic Degrees | Institution                          | Location (city, state/province, country) | Role or Contribution, eg, chair, principal investigator | Group (if more than 1 Group listed in the byline) and/or Subgroup (eg, Steering Committee) |
| Diederik W.J.                              | Dippel              |                              |                  | Erasmus MC University Medical Center | Rotterdam, the Netherlands               |                                                         |                                                                                            |
| Aad                                        | van der Lugt        |                              |                  | Erasmus MC University Medical Center | Rotterdam, the Netherlands               |                                                         |                                                                                            |
| Nadinda A.M.                               | van der Ende        |                              |                  | Erasmus MC University Medical Center | Rotterdam, the Netherlands               |                                                         |                                                                                            |
| Bob                                        | Roozenbeek          |                              |                  | Erasmus MC University Medical Center | Rotterdam, the Netherlands               |                                                         |                                                                                            |
| Moniek P.M.                                | de Maat             |                              |                  | Erasmus MC University Medical Center | Rotterdam, the Netherlands               |                                                         |                                                                                            |
| Leo A.M.                                   | Aerden              |                              |                  | Reinier de Graaf                     | Delft, the Netherlands                   |                                                         |                                                                                            |
| Ido R.                                     | van den Wijngaard   |                              |                  | Haaglanden Medical Center            | The Hague, the Netherlands               |                                                         |                                                                                            |
| Heleen M.                                  | den Hertog          |                              |                  | Isala                                | Zwolle, the Netherlands                  |                                                         |                                                                                            |
| Petra                                      | Kraayeveld          |                              |                  | Reinier de Graaf                     | Delft, the Netherlands                   |                                                         |                                                                                            |
| Geert J.                                   | Lycklama a Nijeholt |                              |                  | Haaglanden Medical Center            | The Hague, the Netherlands               |                                                         |                                                                                            |
| H. Zwenneke                                | Flack               |                              |                  | Isala                                | Zwolle, the Netherlands                  |                                                         |                                                                                            |
| Michael D.                                 | Hill                |                              |                  | University of Calgary                | Calgary, Alberta, Canada                 |                                                         |                                                                                            |
| Jeremy                                     | Rempel              |                              |                  | University of Edmonton               | Edmonton, Alberta, Canada                |                                                         |                                                                                            |
| Ann M.                                     | Lowe                |                              |                  | Independent consultant               | USA                                      |                                                         |                                                                                            |
| Hester F.                                  | Lingsma             |                              |                  | Erasmus MC University Medical Center | Rotterdam, the Netherlands               |                                                         |                                                                                            |
| Nikki                                      | van Leeuwen         |                              |                  | Erasmus MC University Medical Center | Rotterdam, the Netherlands               |                                                         |                                                                                            |

## Supplemental Online Content: Nonauthor Collaborators

\*First name, last name, and suffix (if applicable) are required and will appear in PubMed.

| *First Name and Middle Initial(s) | *Last Name   | *Suffix (eg, Jr, III) | Academic Degrees | Institution                                 | Location (city, state/province, country) | Role or Contribution, eg, chair, principal investigator | Group (if more than 1 Group listed in the byline) and/or Subgroup (eg, Steering Committee) |
|-----------------------------------|--------------|-----------------------|------------------|---------------------------------------------|------------------------------------------|---------------------------------------------------------|--------------------------------------------------------------------------------------------|
| Daan                              | Nieboer      |                       |                  | Erasmus MC University Medical Center        | Rotterdam, the Netherlands               |                                                         |                                                                                            |
| Gregory J.                        | Del Zoppo    |                       |                  | University of Washington School of Medicine | Seattle, Washington, USA                 |                                                         |                                                                                            |
| Dingeman C.                       | Rijken       |                       |                  | Erasmus MC University Medical Center        | Rotterdam, the Netherlands               |                                                         |                                                                                            |
| Adam                              | Cohen        |                       |                  | Leiden University Medical Center            | Leiden, the Netherlands                  |                                                         |                                                                                            |
| Victor                            | Gurewich     |                       |                  | Thrombolytic Science                        | Cambridge, Massachusetts, USA            |                                                         |                                                                                            |
| Lucas E.M.                        | Smagge       |                       |                  | Erasmus MC University Medical Center        | Rotterdam, the Netherlands               |                                                         |                                                                                            |
| Stefan D.                         | Roosendaal   |                       |                  | Amsterdam University Medical Centers        | Amsterdam, the Netherlands               |                                                         |                                                                                            |
| Alida A.                          | Postma       |                       |                  | Maastricht University Medical Center        | Maastricht, the Netherlands              |                                                         |                                                                                            |
| Lonneke S.F.                      | Yo           |                       |                  | Catharina Hospital                          | Eindhoven, the Netherlands               |                                                         |                                                                                            |
| G. Menno                          | Krietemeijer |                       |                  | Catharina Hospital                          | Eindhoven, the Netherlands               |                                                         |                                                                                            |
| Martin                            | Sterrenberg  |                       |                  | Erasmus MC University Medical Center        | Rotterdam, the Netherlands               |                                                         |                                                                                            |
| Naziha                            | El Ghannouti |                       |                  | Erasmus MC University Medical Center        | Rotterdam, the Netherlands               |                                                         |                                                                                            |
| Debby                             | Priem        |                       |                  | Erasmus MC University Medical Center        | Rotterdam, the Netherlands               |                                                         |                                                                                            |
| Monique                           | Batenburg    |                       |                  | Reinier de Graaf                            | Delft, the Netherlands                   |                                                         |                                                                                            |
| Eva                               | Ponjee       |                       |                  | Isala                                       | Zwolle, the Netherlands                  |                                                         |                                                                                            |
| Rieke                             | Eilander     |                       |                  | Isala                                       | Zwolle, the Netherlands                  |                                                         |                                                                                            |

## Supplemental Online Content: Nonauthor Collaborators

\*First name, last name, and suffix (if applicable) are required and will appear in PubMed.

| *First Name and Middle Initial(s) | *Last Name           | *Suffix (eg, Jr, III) | Academic Degrees | Institution                          | Location (city, state/province, country) | Role or Contribution, eg, chair, principal investigator | Group (if more than 1 Group listed in the byline) and/or Subgroup (eg, Steering Committee) |
|-----------------------------------|----------------------|-----------------------|------------------|--------------------------------------|------------------------------------------|---------------------------------------------------------|--------------------------------------------------------------------------------------------|
| Joke                              | de Meris             |                       |                  | Haaglanden Medical Center            | The Hague, the Netherlands               |                                                         |                                                                                            |
| Tamara                            | Dofferhoff-Vermeulen |                       |                  | Haaglanden Medical Center            | The Hague, the Netherlands               |                                                         |                                                                                            |
| Sanne J.                          | den Hartog           |                       |                  | Erasmus MC University Medical Center | Rotterdam, the Netherlands               |                                                         |                                                                                            |
| Stijn                             | Kremer               |                       |                  | Haaglanden Medical Center            | The Hague, the Netherlands               |                                                         |                                                                                            |
| Sven P.R.                         | Luijten              |                       |                  | Erasmus MC University Medical Center | Rotterdam, the Netherlands               |                                                         |                                                                                            |
| Leontien                          | Heiligers            |                       |                  | Erasmus MC University Medical Center | Rotterdam, the Netherlands               |                                                         |                                                                                            |
| Angela                            | Lansbergen-Engel     |                       |                  | Erasmus MC University Medical Center | Rotterdam, the Netherlands               |                                                         |                                                                                            |
| Karin                             | Jager                |                       |                  | Erasmus MC University Medical Center | Rotterdam, the Netherlands               |                                                         |                                                                                            |
