# Supplementary material
Source: PubMed Central journal article supplement (PMC10203964)
Supplement: jamaneurol-e231262-s004.pdf [file jamaneurol-e231262-s004.pdf]

## Data Sharing Statement

van der Ende. Safety and Efficacy of Dual Thrombolytic Therapy With Mutant Prourokinase and Small Bolus Alteplase for Ischemic Stroke. *JAMA Neurol.* Published May 22, 2023.  
doi:10.1001/jamaneurol.2023.1262

### Data

**Data available:** Yes

**Data types:** Participant data with identifiers, Data dictionary

**How to access data:** Access to the trial dataset and statistical code will be made available upon request to the Principal Investigators. Data may also be shared with non-commercial parties for scientific purposes, including individual patient meta-analyses, and with commercial parties for FDA approval. Consent was asked specifically for these purposes.

**When available:** With publication

### Supporting Documents

**Document types:** Other (please specify)

**Additional Information:** Trial protocol and statistical analysis plan

**How to access documents:** Trial protocol and statistical analysis plan

**When available:** With publication

### Additional Information

**Who can access the data:** anyone requesting the data

**Types of analyses:** For prespecified purpose

**Mechanisms of data availability:** after approval of proposal and signed data access agreement
